# Supplementary material for: A calix[3]carbazole-based cavitand: synthesis, structure and its complexation with fullerenes
Source: Royal Society of Chemistry journal article supplement (doi:10.1039/d4cc00928b), 2024-01-01
Supplement: d4cc00928b1.pdf [file d4cc00928b1.pdf]

## Electronic Supplementary Information

### A calix[3]carbazole-based cavitand: synthesis, structure and its complexation with fullerenes

Fan Zhang,<sup>a,b</sup> Xu-Sheng Du,<sup>b</sup> Kui-Zhu Song,<sup>a</sup> Ying Han,<sup>b,\*</sup> Hai-Yan Lu<sup>a,\*</sup> and Chuan-Feng Chen<sup>a,b,\*</sup>

<sup>a</sup> University of Chinese Academy of Sciences, Beijing 100049, China.

<sup>b</sup> Beijing National Laboratory for Molecular Sciences, CAS Key Laboratory of Molecular Recognition  
and Function, Institute of Chemistry, Chinese Academy of Sciences, Beijing 100190, China.

Email: hanying463@iccas.ac.cn; haiyanlu@ucas.ac.cn; cchen@iccas.ac.cn

### Contents

|                                                             |     |
|-------------------------------------------------------------|-----|
| 1. General information .....                                | S2  |
| 2. Synthesis and characterization .....                     | S2  |
| 3. NMR and mass spectra of 2 .....                          | S3  |
| 4. X-ray crystal structures and crystallographic data ..... | S6  |
| 5. Photophysical properties .....                           | S25 |
| 6. Electrochemical measurements .....                       | S27 |
| 7. UV-vis absorption spectra studies of complexations ..... | S28 |
| 8. MALDI-TOF mass spectra studies of complexations .....    | S29 |
| 9. Color changes of complexations .....                     | S30 |
| 10. Determination of the association constants .....        | S30 |
| 11. Theoretical calculations .....                          | S32 |
| 12. Cartesian coordinates of the optimized structures ..... | S39 |
| 13. References .....                                        | S50 |

## 1. General information

All the reagents and solvents were commercially available and used without further purification. Unless otherwise stated, the reactions were carried out under inert and anhydrous conditions. Thin layer chromatography (TLC) was performed by silica gel GF<sub>254</sub>. The melting point was determined by WRR melting point apparatus without correction. <sup>1</sup>H, <sup>13</sup>C NMR spectra were recorded on Bruker® AVIII 300 MHz NMR, Bruker® AVIII 500 MHz NMR and Bruker 700 MHz NMR spectrometers and reported in parts per million (ppm) from internal standard TMS. Matrix-Assisted Laser Desorption/Ionization Time-of-Flight (MALDI-TOF) mass spectrometry were recorded on the Autoflex III. Single crystal data were collected on a Bruker Smart APEXII CCD diffractometer using graphite monochromated CuK $\alpha$  radiation. Ultraviolet-visible spectra were recorded on PerkinElmer® UV/Vis/NIR spectrometer (Lambda 950), and fluorescence spectra and transient photoluminance decay characteristics were measured using the Edinburgh Instruments FLS1000 spectrometer. Based on density functional theory (DFT), the structures were optimized by using the B3LYP functional and 6-31G(d) basis set carried out by Gaussian 16 program.<sup>S1</sup>

## 2. Synthesis and characterization

The synthetic procedures of calix[3]carbazole **1** were described in the literatures.<sup>S2, S3</sup>

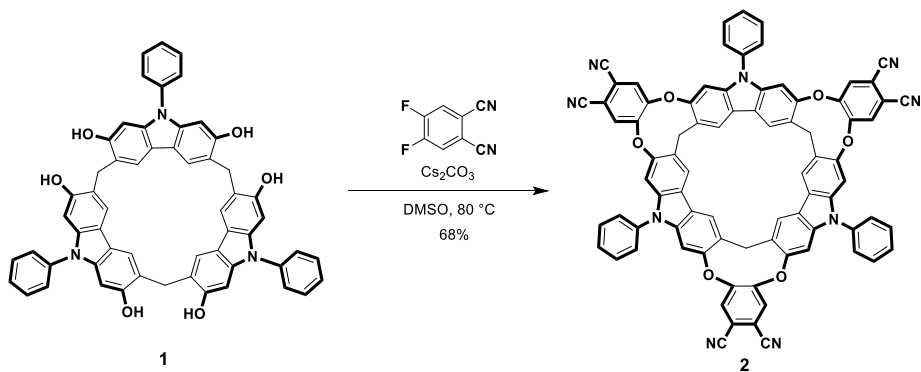

**Calix[3]carbazole-based deep cavitand (2):** To a solution of **1** (172 mg, 0.2 mmol) and Cs<sub>2</sub>CO<sub>3</sub> (1.303 g, 4 mmol) in anhydrous dimethyl sulfoxide (20 mL) was added 4,5-difluorophthalonitrile (148 mg, 0.9 mmol) under argon. The mixture was stirred and heated at 80 °C for 24 hours. Then the reaction was quenched by the addition of water (50 mL), and extracted with dichloromethane (3 × 100 mL). The combined organic layer was dried with anhydrous MgSO<sub>4</sub>, and concentrated under a reduced pressure

to give a crude solid. The solid was purified by column chromatography with CH<sub>2</sub>Cl<sub>2</sub> as the eluent to give **2** as light yellow solid (167 mg, 68 %). M.p.: > 280 °C. <sup>1</sup>H NMR (300 MHz, CDCl<sub>3</sub>, 298K): δ 7.99 (s, 6H), 7.62 (s, 6H), 7.57 (t, *J* = 7.2 Hz, 6H), 7.47 (t, *J* = 7.4 Hz, 3H), 7.39 (d, *J* = 8.2 Hz, 6H), 7.09 (s, 6H), 4.67 (d, *J* = 13.1 Hz, 3H), 3.89 (d, *J* = 13.1 Hz, 3H). <sup>13</sup>C NMR (126 MHz, CDCl<sub>3</sub>, 298 K): δ 153.7, 141.6, 136.8, 130.5, 128.6, 126.6, 122.3, 120.9, 114.7, 112.4, 102.4, 29.9. MALDI-TOF MS: *m/z* calcd for [M] C<sub>81</sub>H<sub>39</sub>N<sub>9</sub>O<sub>6</sub>: 1233.3023; found: 1233.3021.

### 3. NMR and mass spectra of **2**

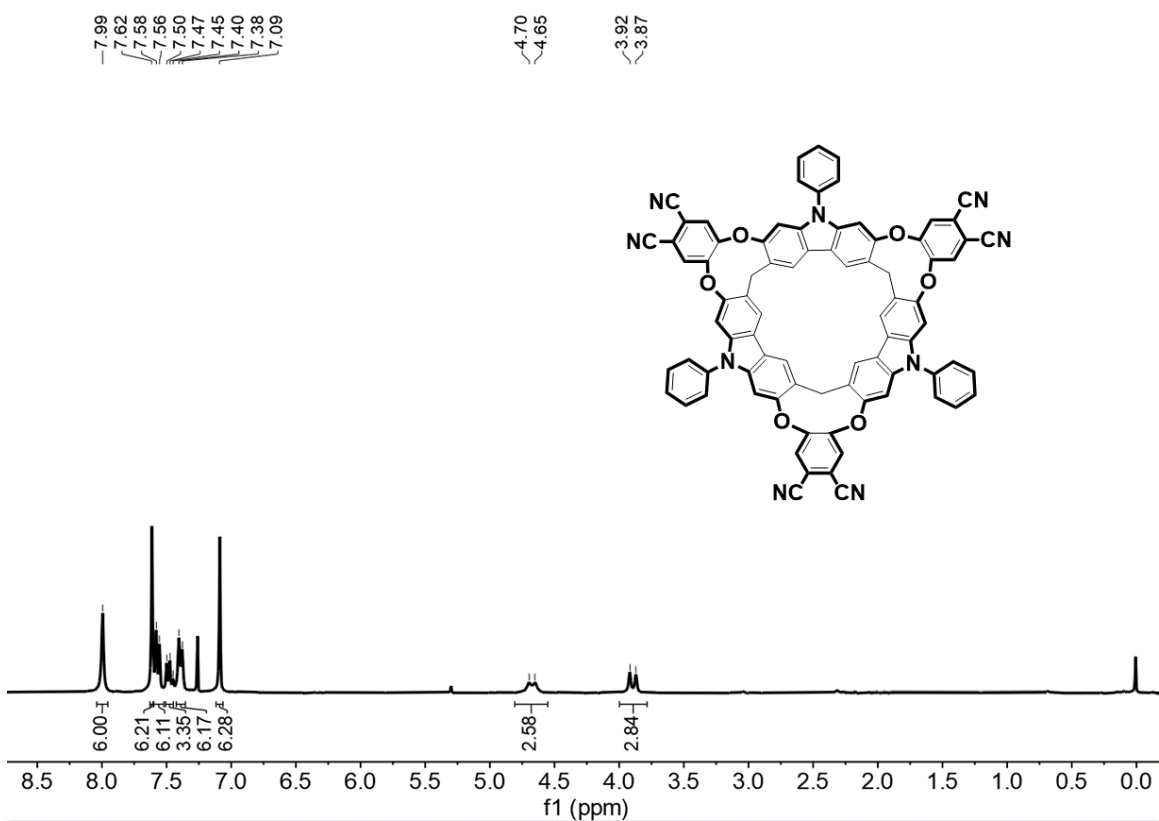

**Fig. S1** <sup>1</sup>H NMR spectrum (300 MHz, CDCl<sub>3</sub>, 298K) of **2**.

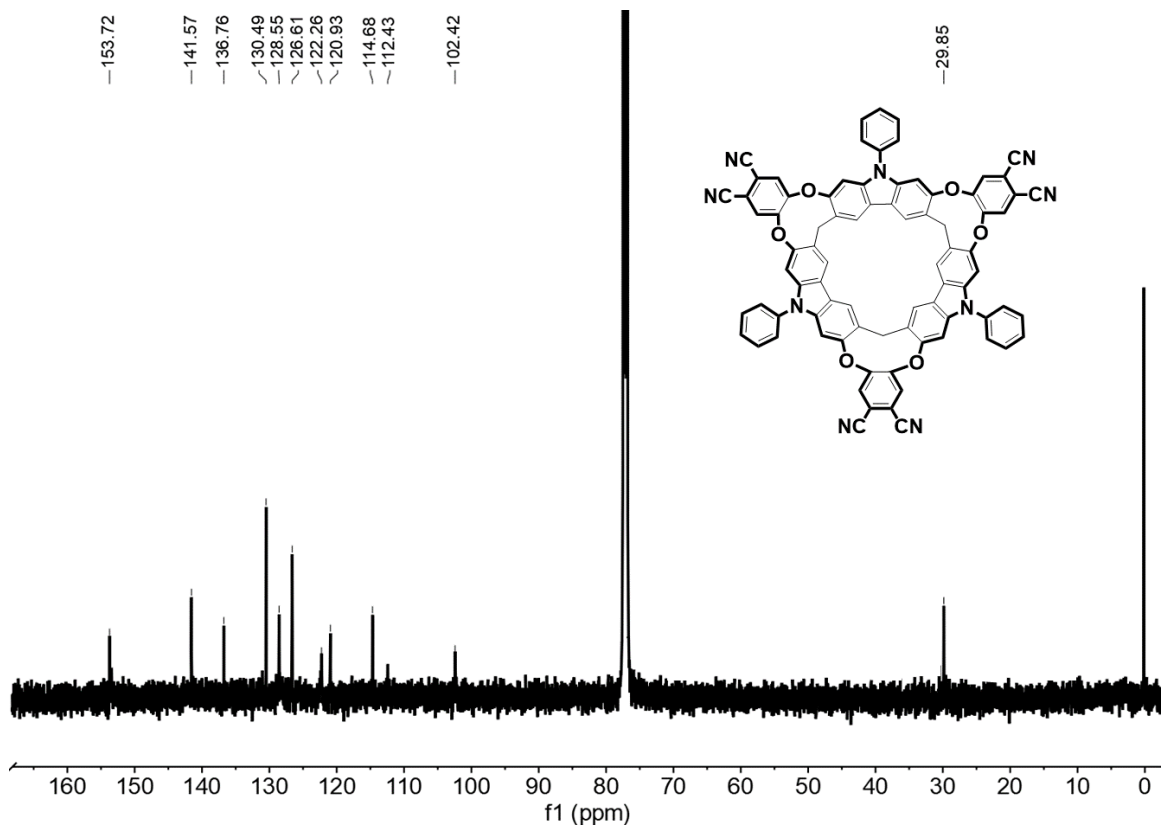

**Fig. S2**  $^{13}\text{C}$  NMR spectrum (126 MHz,  $\text{CDCl}_3$ , 298K) of **2**.

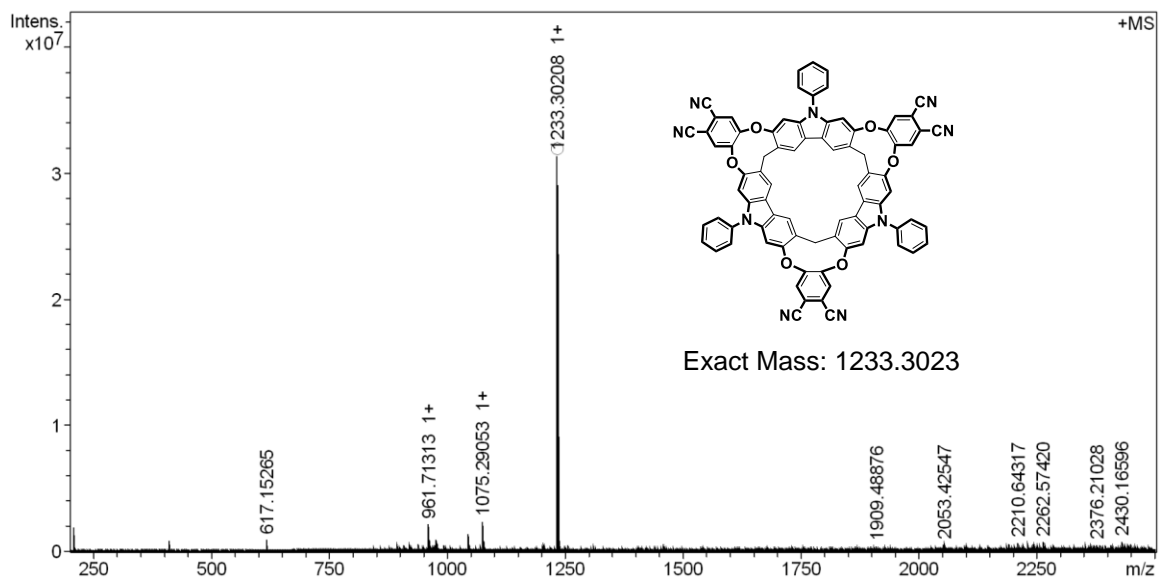

**Fig. S3** MALDI-TOF mass spectrum of **2**.

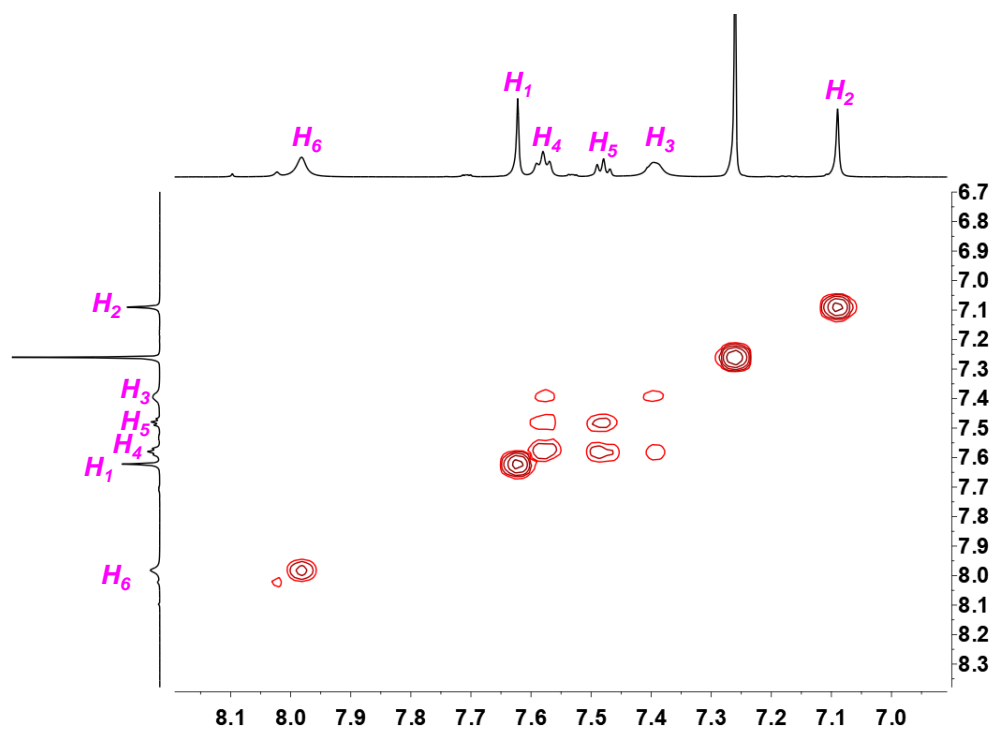

**Fig. S4**  $^1\text{H}$ - $^1\text{H}$  COSY spectrum (700 MHz,  $\text{CDCl}_3$ , 298 K) of **2**.

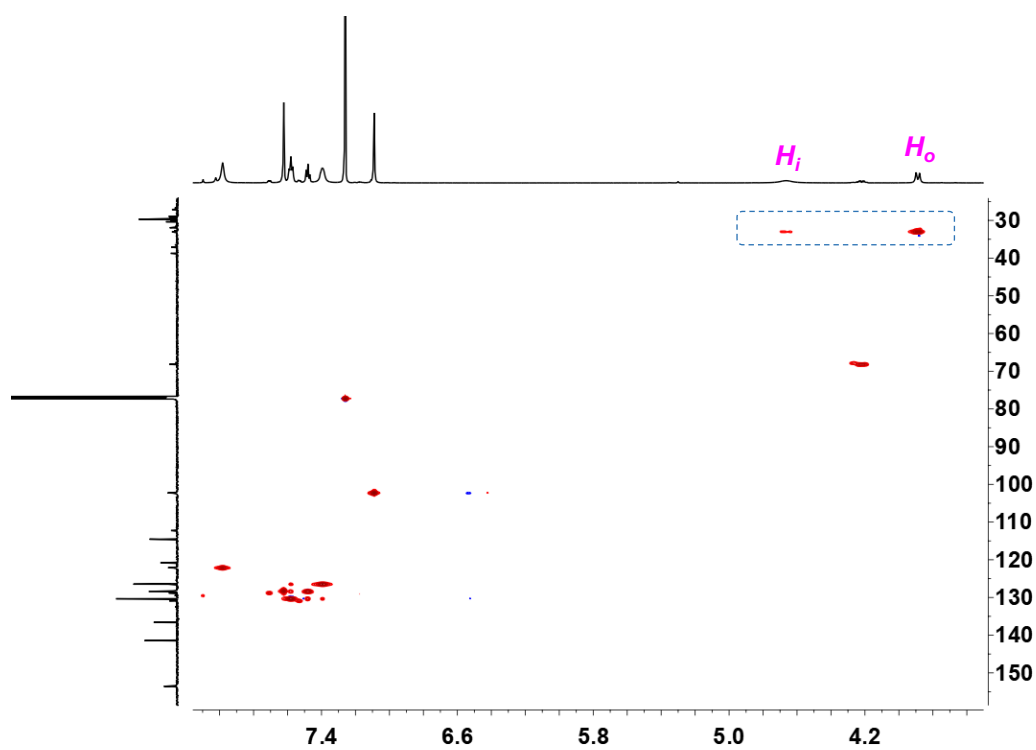

**Fig. S5**  $^1\text{H}$ - $^{13}\text{C}$  HSQC spectrum (700 MHz,  $\text{CDCl}_3$ , 298 K) of **2**.

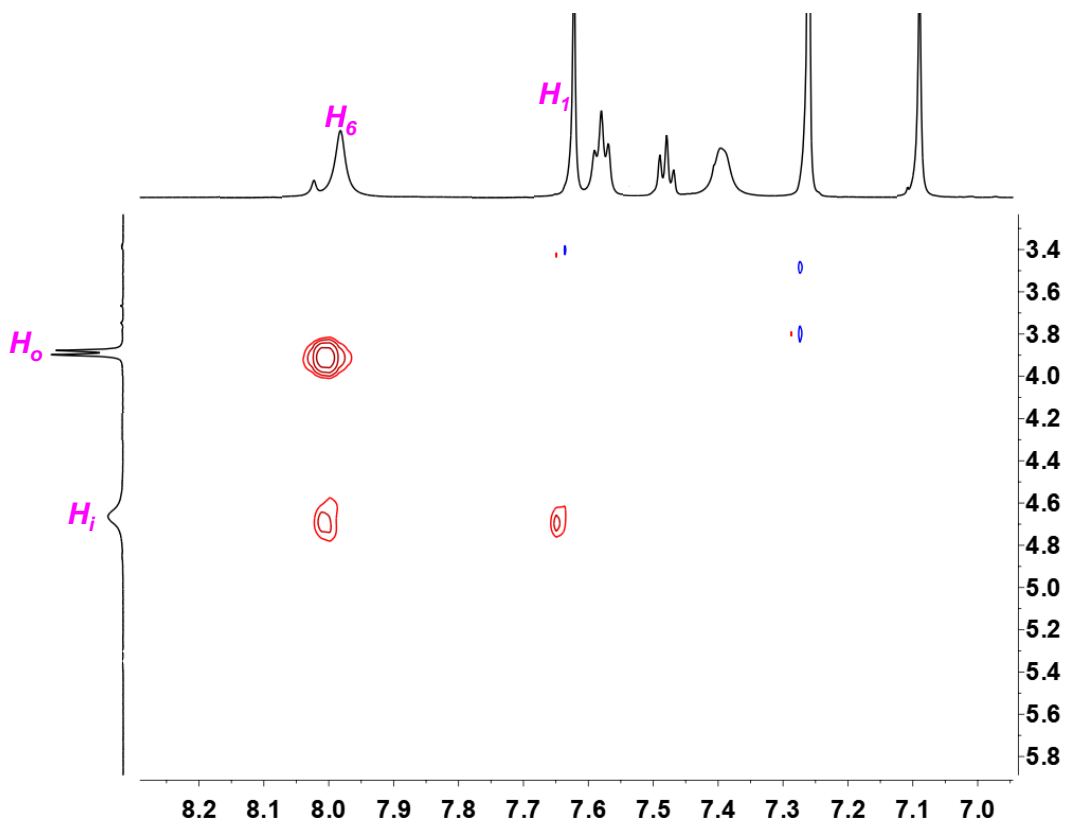

**Fig. S6** 2D NOESY spectrum (700 MHz,  $\text{CDCl}_3$ , 298 K) of **2**.

#### 4. X-ray crystal structures and crystallographic data

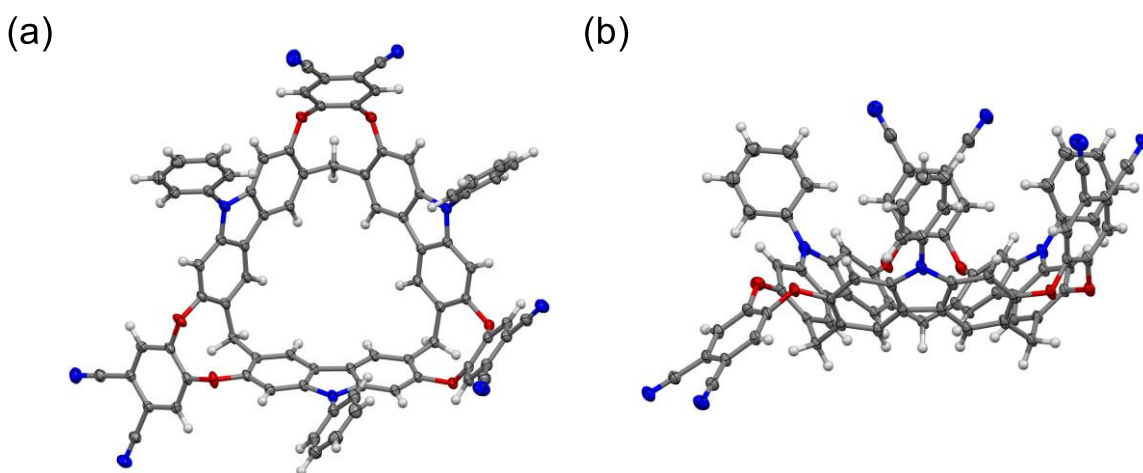

**Fig. S7** ORTEP drawing of **2-c1** from (a) top view and (b) side view (the thermal ellipsoids are displayed at a 30 % probability).

**Table S1.** X-ray crystallographic and the refinement data of **2-c1**.

| CCDC                                                         | 2305712                                                                      |
|--------------------------------------------------------------|------------------------------------------------------------------------------|
| Empirical formula                                            | C <sub>81</sub> H <sub>39</sub> N <sub>9</sub> O <sub>6</sub>                |
| Formula weight                                               | 1233.30                                                                      |
| Temperature/K                                                | 169.99(10)                                                                   |
| Crystal system                                               | monoclinic                                                                   |
| Space group                                                  | <i>P2<sub>1</sub>/m</i>                                                      |
| <i>a</i> /Å                                                  | 12.7611(3)                                                                   |
| <i>b</i> /Å                                                  | 18.5038(3)                                                                   |
| <i>c</i> /Å                                                  | 14.1018(3)                                                                   |
| $\alpha$ /°                                                  | 90                                                                           |
| $\beta$ /°                                                   | 100.643(2)                                                                   |
| $\gamma$ /°                                                  | 90                                                                           |
| Volume/Å <sup>3</sup>                                        | 3272.56(12)                                                                  |
| <i>Z</i>                                                     | 4                                                                            |
| $\rho_{\text{calc}}/\text{cm}^3$                             | 1.394                                                                        |
| $\mu/\text{mm}^{-1}$                                         | 0.959                                                                        |
| <i>F</i> (000)                                               | 1415.0                                                                       |
| Crystal size/mm <sup>3</sup>                                 | 0.33 × 0.26 × 0.14                                                           |
| Radiation                                                    | CuK $\alpha$ ( $\lambda$ = 1.54184)                                          |
| 2 $\Theta$ range for data collection/°                       | 6.378 to 151.102                                                             |
| Index ranges                                                 | -16 ≤ <i>h</i> ≤ 15, -19 ≤ <i>k</i> ≤ 23, -17 ≤ <i>l</i> ≤ 17                |
| Reflections collected                                        | 25286                                                                        |
| Independent reflections                                      | 6729 [ <i>R</i> <sub>int</sub> = 0.0449, <i>R</i> <sub>sigma</sub> = 0.0362] |
| Data/restraints/parameters                                   | 6729/0/445                                                                   |
| Goodness-of-fit on <i>F</i> <sup>2</sup>                     | 1.060                                                                        |
| Final <i>R</i> indexes [ <i>I</i> ≥ 2 $\sigma$ ( <i>I</i> )] | <i>R</i> <sub>1</sub> = 0.0457, <i>wR</i> <sub>2</sub> = 0.1254              |
| Final <i>R</i> indexes [all data]                            | <i>R</i> <sub>1</sub> = 0.0602, <i>wR</i> <sub>2</sub> = 0.1341              |
| Largest diff. peak/hole / e Å <sup>-3</sup>                  | 0.26/-0.27                                                                   |

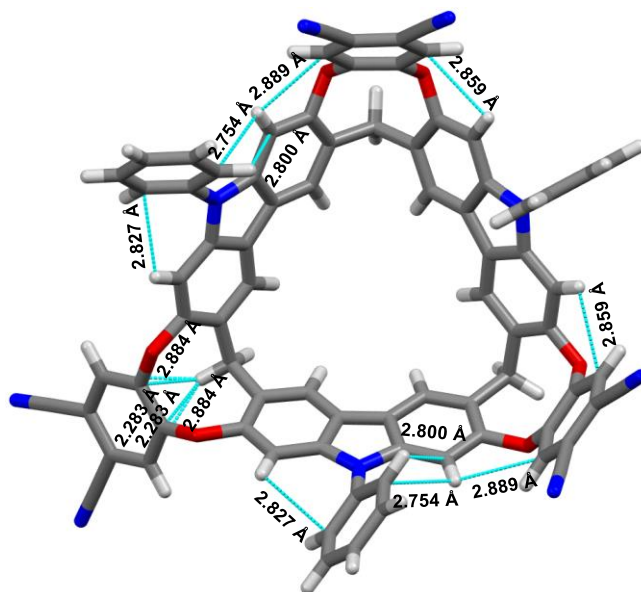

**Fig. S8** The multiple intramolecular C-H $\cdots$  $\pi$  interactions of **2-c1**.

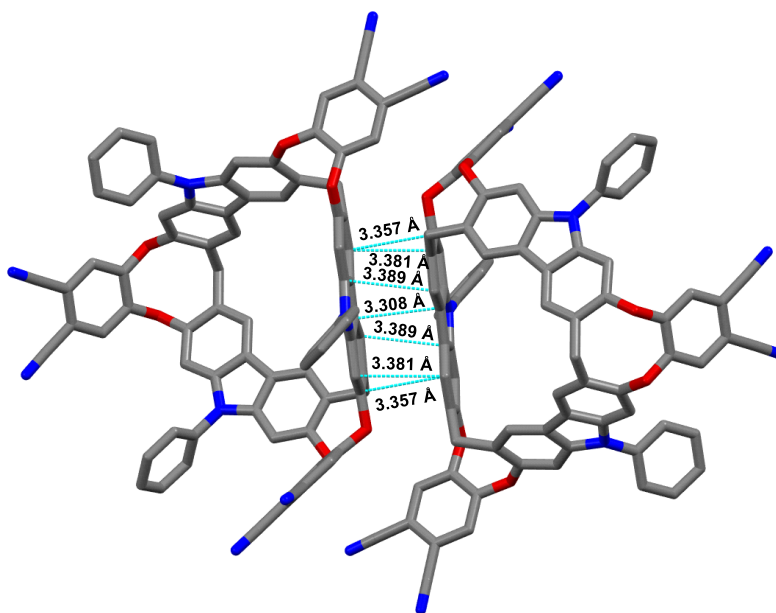

**Fig. S9** The multiple intermolecular  $\pi\cdots\pi$  interactions of two **2-c1** molecules.



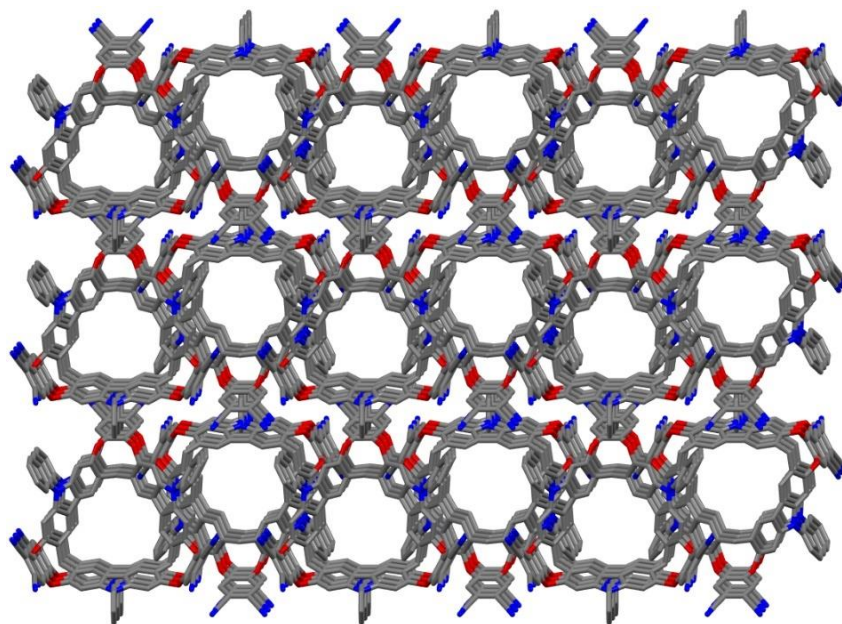

**Fig. S10** The packing mode of **2-c1** viewed along *a* axis.

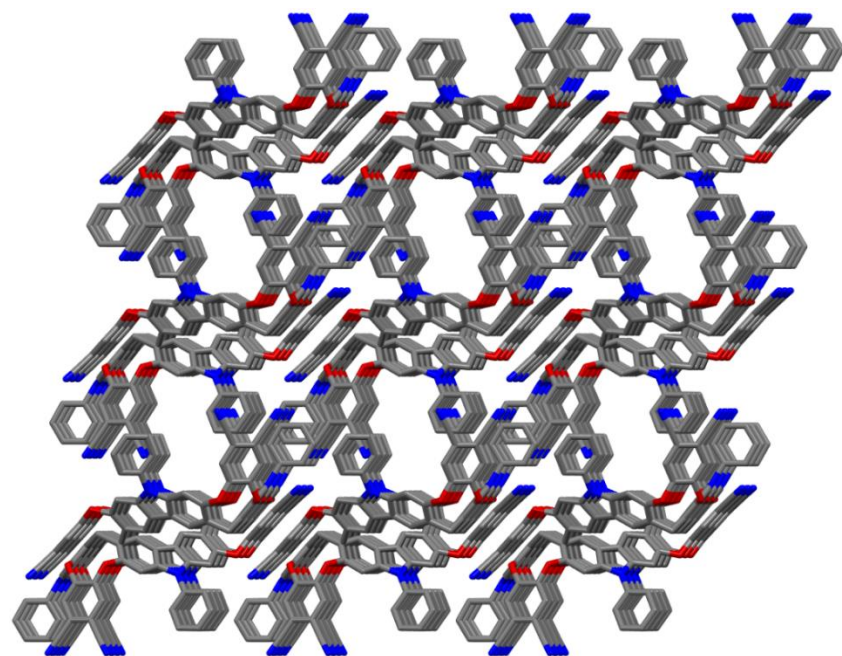

**Fig. S11** The packing mode of **2-c1** viewed along *b* axis.

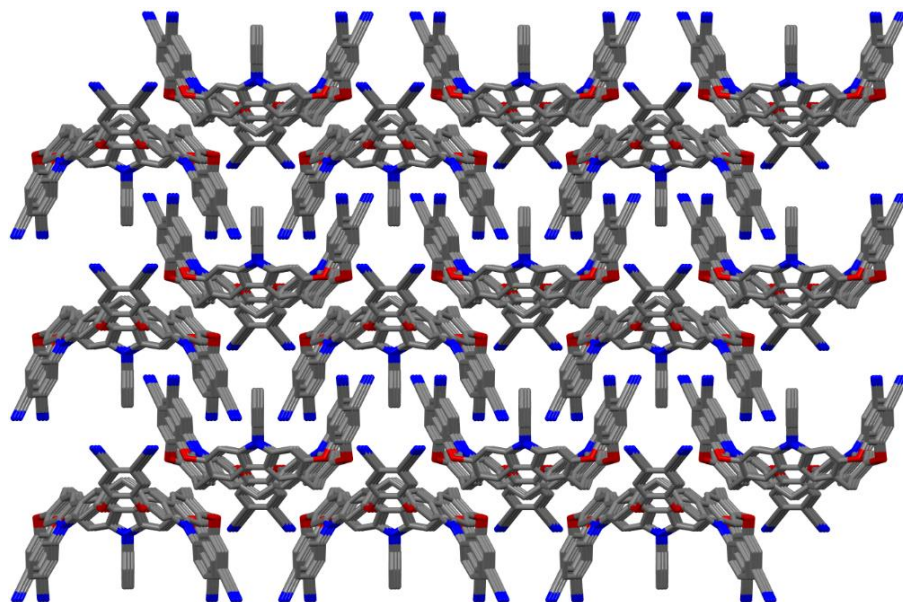

**Fig. S12** The packing mode of **2-c1** viewed along *c* axis.

(a)

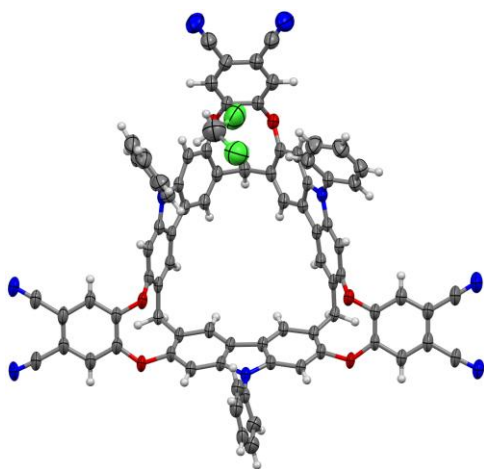

(b)

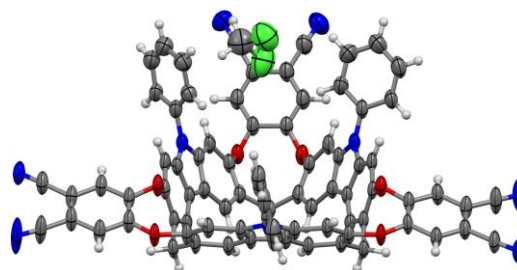

**Fig. S13** ORTEP drawing of **2-c2** from (a) top view and (b) side view (the thermal ellipsoids are displayed at a 30 % probability).

**Table S2.** X-ray crystallographic and the refinement data of **2-c2**.

| CCDC                                        | 2305713                                                                       |
|---------------------------------------------|-------------------------------------------------------------------------------|
| Empirical formula                           | C <sub>82</sub> H <sub>41</sub> Cl <sub>2</sub> N <sub>9</sub> O <sub>6</sub> |
| Formula weight                              | 1317.26                                                                       |
| Temperature/K                               | 169.98(10)                                                                    |
| Crystal system                              | monoclinic                                                                    |
| Space group                                 | <i>I</i> 2/ <i>a</i>                                                          |
| a/Å                                         | 30.8326(16)                                                                   |
| b/Å                                         | 13.5754(7)                                                                    |
| c/Å                                         | 31.1005(15)                                                                   |
| $\alpha$ /°                                 | 90                                                                            |
| $\beta$ /°                                  | 106.960(6)                                                                    |
| $\gamma$ /°                                 | 90                                                                            |
| Volume/Å <sup>3</sup>                       | 12451.4(12)                                                                   |
| Z                                           | 8                                                                             |
| $\rho$ calc/gcm <sup>3</sup>                | 1.359                                                                         |
| $\mu$ /mm <sup>-1</sup>                     | 1.059                                                                         |
| F(000)                                      | 5243.0                                                                        |
| Crystal size/mm <sup>3</sup>                | 0.3 × 0.2 × 0.1                                                               |
| Radiation                                   | CuK $\alpha$ ( $\lambda$ = 1.54184)                                           |
| 2 $\Theta$ range for data collection/°      | 5.942 to 152.224                                                              |
| Index ranges                                | -38 ≤ h ≤ 38, -16 ≤ k ≤ 16, -39 ≤ l ≤ 38                                      |
| Reflections collected                       | 80263                                                                         |
| Independent reflections                     | 12769 [R <sub>int</sub> = 0.0935, R <sub>sigma</sub> = 0.0458]                |
| Data/restraints/parameters                  | 12769/282/975                                                                 |
| Goodness-of-fit on F <sup>2</sup>           | 1.532                                                                         |
| Final R indexes [I ≥ 2 $\sigma$ (I)]        | R <sub>1</sub> = 0.1210, wR <sub>2</sub> = 0.2740                             |
| Final R indexes [all data]                  | R <sub>1</sub> = 0.1954, wR <sub>2</sub> = 0.3023                             |
| Largest diff. peak/hole / e Å <sup>-3</sup> | 0.54/-0.46                                                                    |

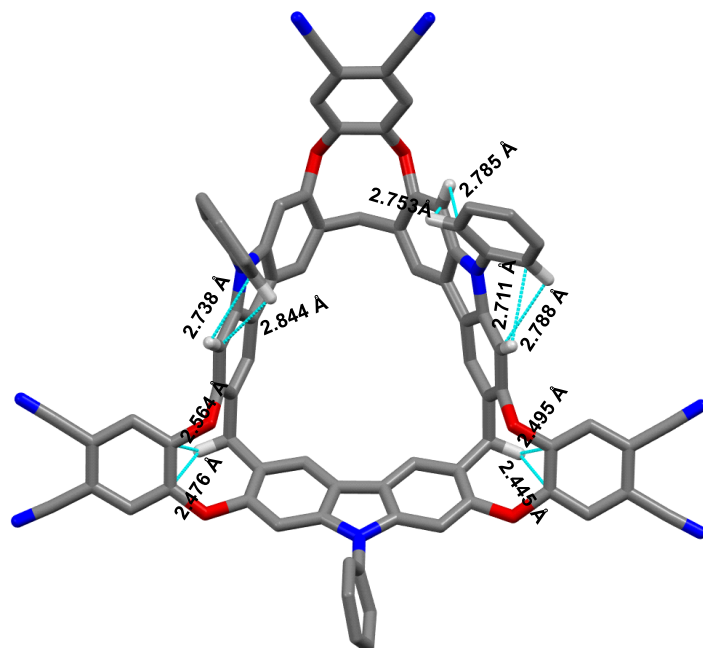

**Fig. S14** The multiple intramolecular C-H $\cdots$  $\pi$  interactions of **2-c2**.

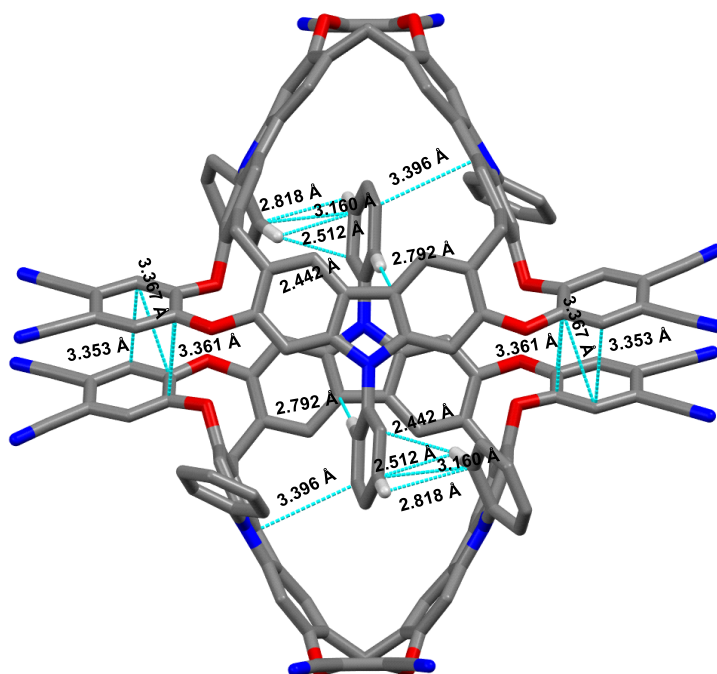

**Fig. S15** The multiple intermolecular  $\pi\cdots\pi$  and C-H $\cdots\pi$  interactions of two **2-c2** molecules.



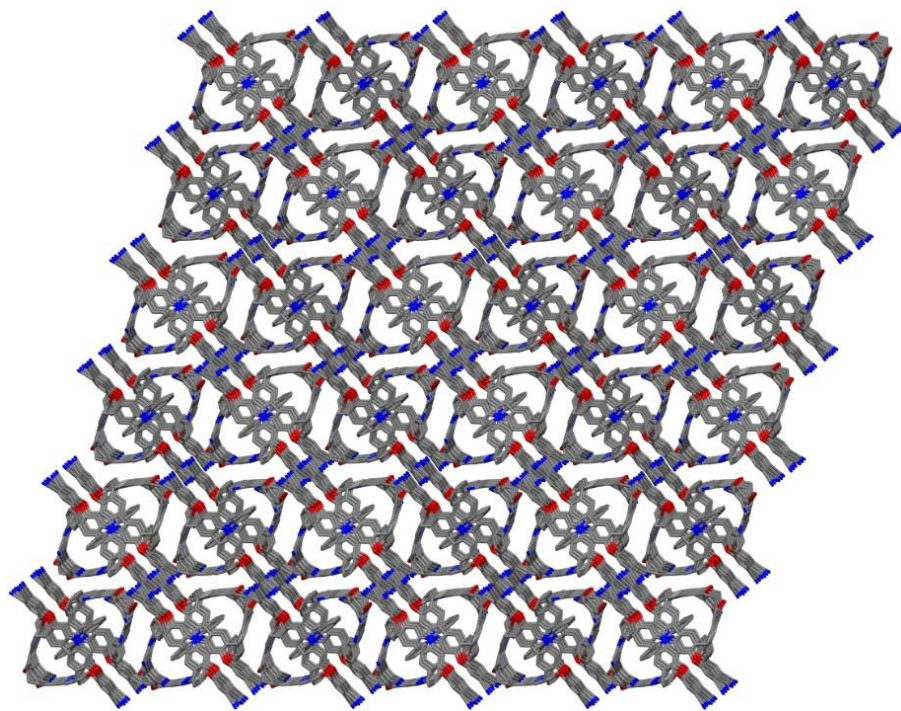

**Fig. S16** The packing mode of **2-c2** viewed along *b* axis.

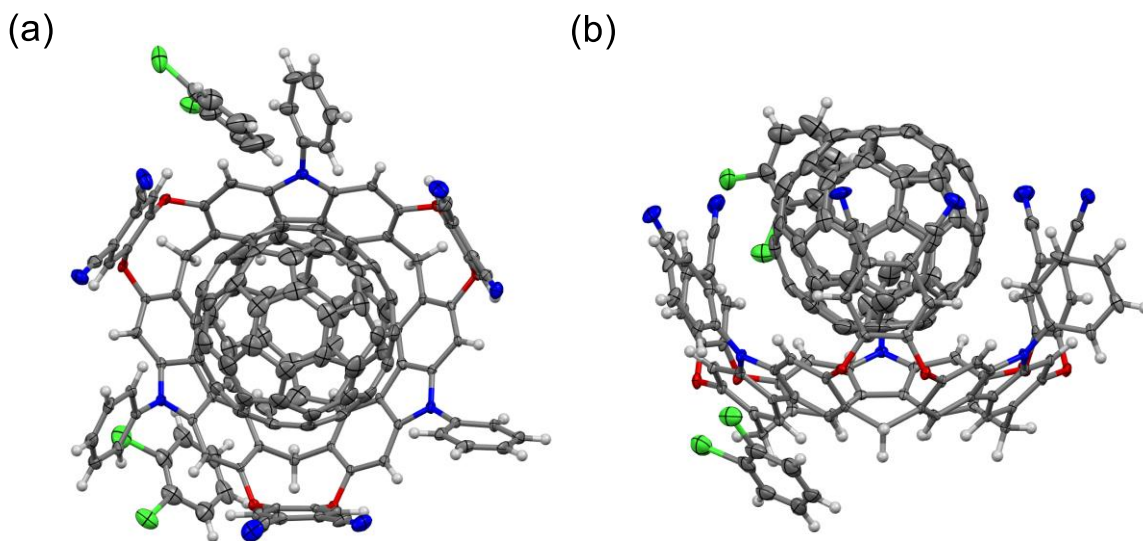

**Fig. S17** ORTEP drawing of **C<sub>60</sub>@2** from (a) top view and (b) side view (the thermal ellipsoids are displayed at a 30 % probability).

**Table S3.** X-ray crystallographic and the refinement data of **C<sub>60</sub>@2**

| CCDC                                        | 2305715                                                                        |
|---------------------------------------------|--------------------------------------------------------------------------------|
| Empirical formula                           | C <sub>153</sub> H <sub>47</sub> Cl <sub>4</sub> N <sub>9</sub> O <sub>6</sub> |
| Formula weight                              | 2248.79                                                                        |
| Temperature/K                               | 169.98(10)                                                                     |
| Crystal system                              | monoclinic                                                                     |
| Space group                                 | <i>P2<sub>1</sub>/n</i>                                                        |
| a/Å                                         | 13.0791(4)                                                                     |
| b/Å                                         | 32.0488(9)                                                                     |
| c/Å                                         | 27.0224(9)                                                                     |
| $\alpha$ /°                                 | 90                                                                             |
| $\beta$ /°                                  | 94.916(3)                                                                      |
| $\gamma$ /°                                 | 90                                                                             |
| Volume/Å <sup>3</sup>                       | 11285.3(6)                                                                     |
| Z                                           | 4                                                                              |
| $\rho_{\text{calc}}/\text{cm}^3$            | 1.324                                                                          |
| $\mu/\text{mm}^{-1}$                        | 1.493                                                                          |
| F(000)                                      | 4576.0                                                                         |
| Crystal size/mm <sup>3</sup>                | 0.45 × 0.35 × 0.31                                                             |
| Radiation                                   | CuK $\alpha$ ( $\lambda$ = 1.54184)                                            |
| 2 $\Theta$ range for data collection/°      | 4.286 to 152.546                                                               |
| Index ranges                                | -16 ≤ h ≤ 16, -39 ≤ k ≤ 23, -33 ≤ l ≤ 33                                       |
| Reflections collected                       | 80169                                                                          |
| Independent reflections                     | 22551 [ $R_{\text{int}}$ = 0.0963, $R_{\text{sigma}}$ = 0.0906]                |
| Data/restraints/parameters                  | 22551/633/1550                                                                 |
| Goodness-of-fit on F <sup>2</sup>           | 1.512                                                                          |
| Final R indexes [ $I \geq 2\sigma(I)$ ]     | $R_1$ = 0.1425, $wR_2$ = 0.4056                                                |
| Final R indexes [all data]                  | $R_1$ = 0.1961, $wR_2$ = 0.4366                                                |
| Largest diff. peak/hole / e Å <sup>-3</sup> | 2.07/-1.08                                                                     |

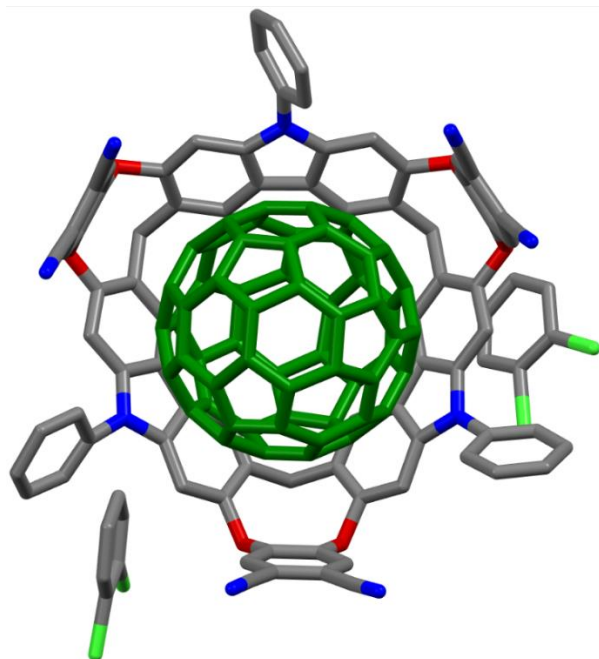

**Fig. S18** Crystal structure of complex  $C_{60}@2$  with two *o*-DCBs around from top view.

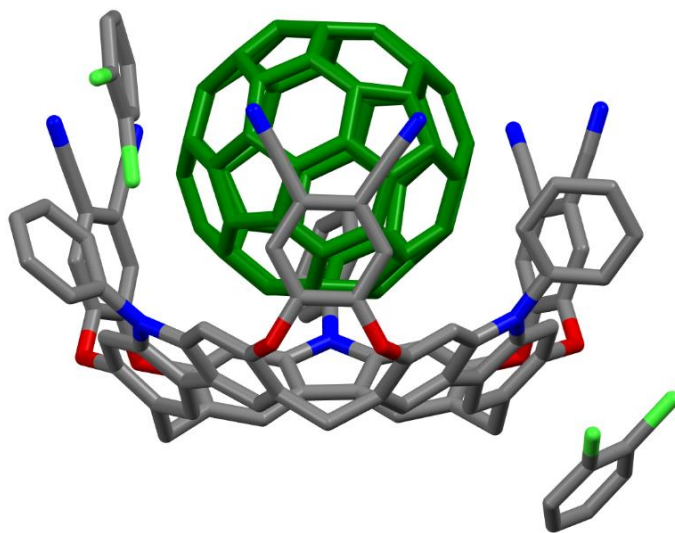

**Fig. S19** Crystal structure of complex  $C_{60}@2$  with two *o*-DCBs around from side view.

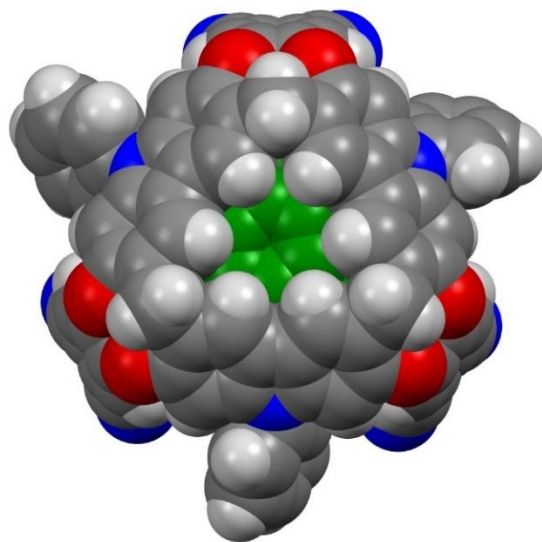

**Fig. S20** Space-filling model of the 1:1 complexation between **2** and C<sub>60</sub> from top view.

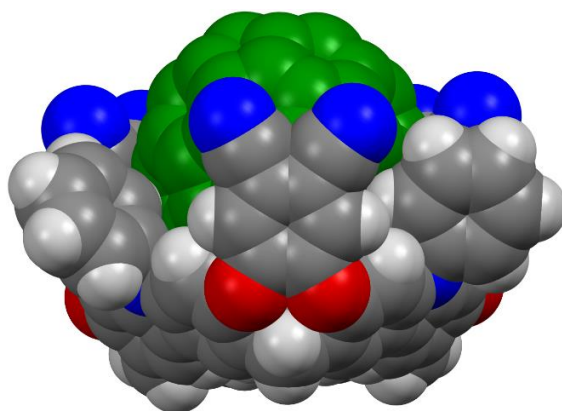

**Fig. S21** Space-filling model of the 1:1 complexation between **2** and C<sub>60</sub> from side view.

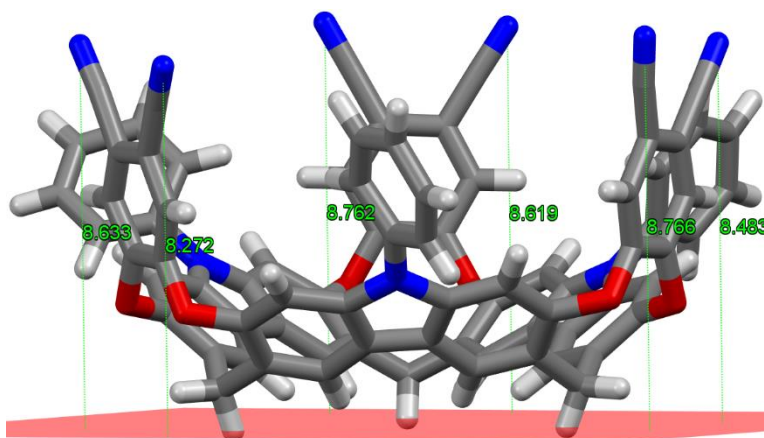

**Fig. S22** Side view of **2** showing the cavity depth.



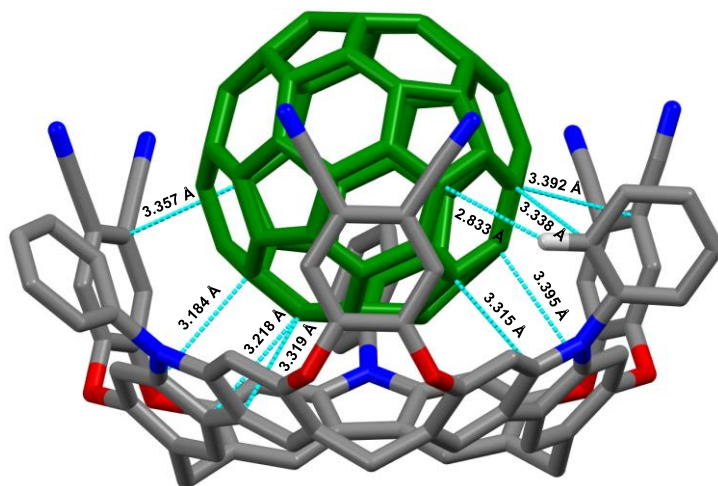

**Fig. S23** The multiple intermolecular interactions between **2** and encapsulated C<sub>60</sub> molecule.

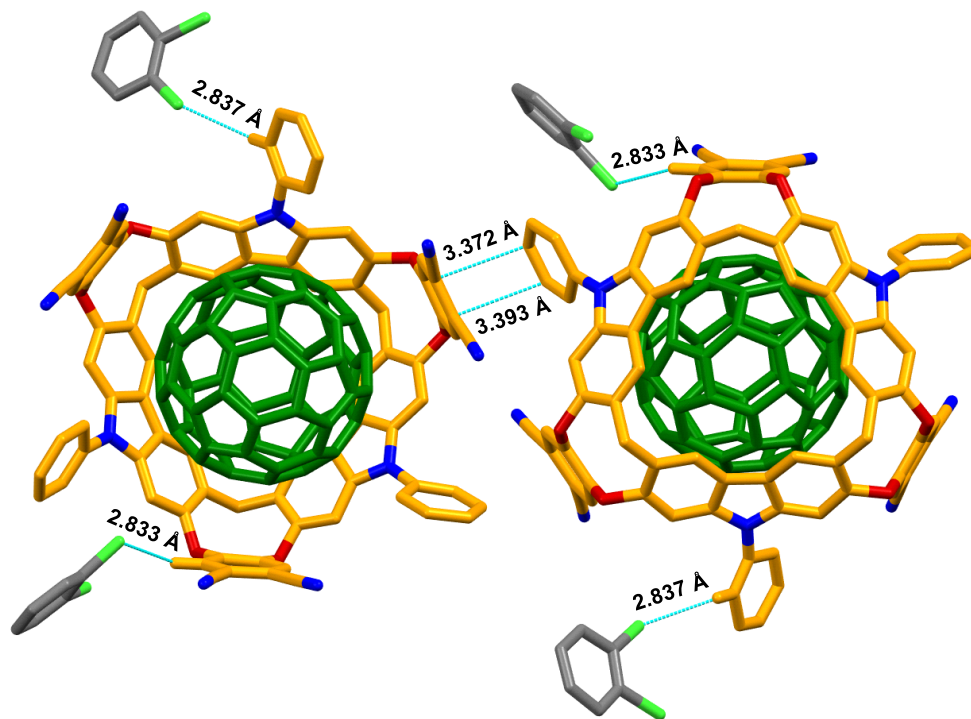

**Fig. S24** Intermolecular interactions between the adjacent complexes C<sub>60</sub>@**2** and four *o*-DCBs.

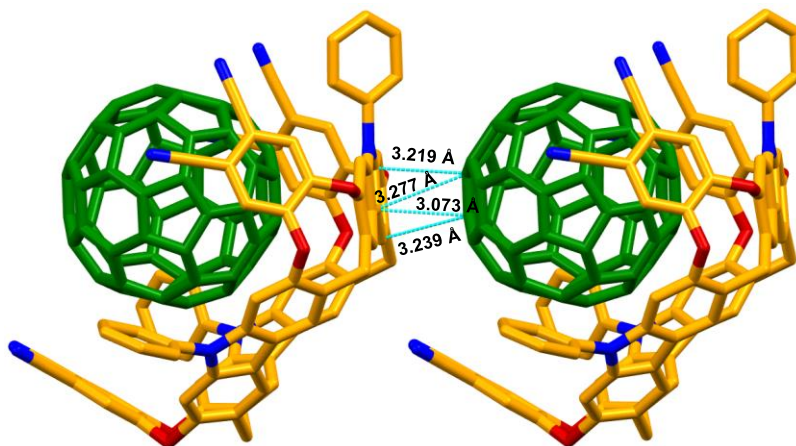

**Fig. S25** The multiple intermolecular  $\pi \cdots \pi$  interactions of two adjacent complexes  $C_{60}@2$ .

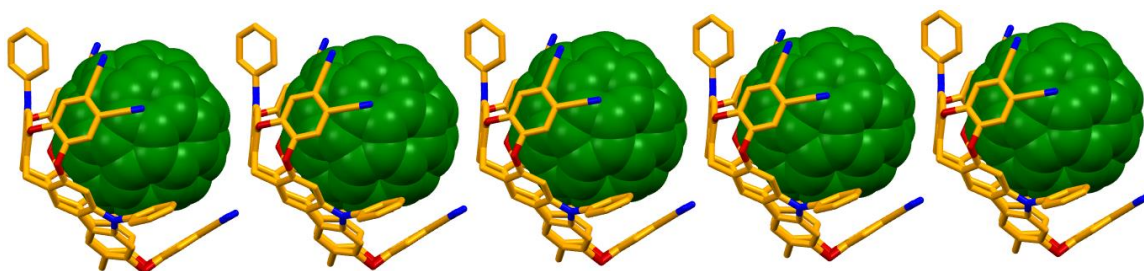

**Fig. S26** The ordered packing mode of complexes  $C_{60}@2$ .

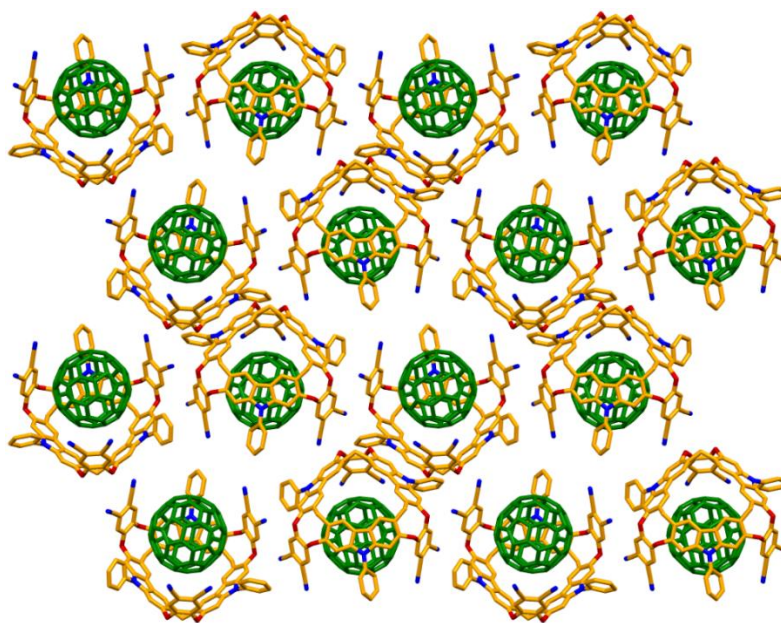

**Fig. S27** The packing mode of complexes  $C_{60}@2$  viewed along  $a$  axis.

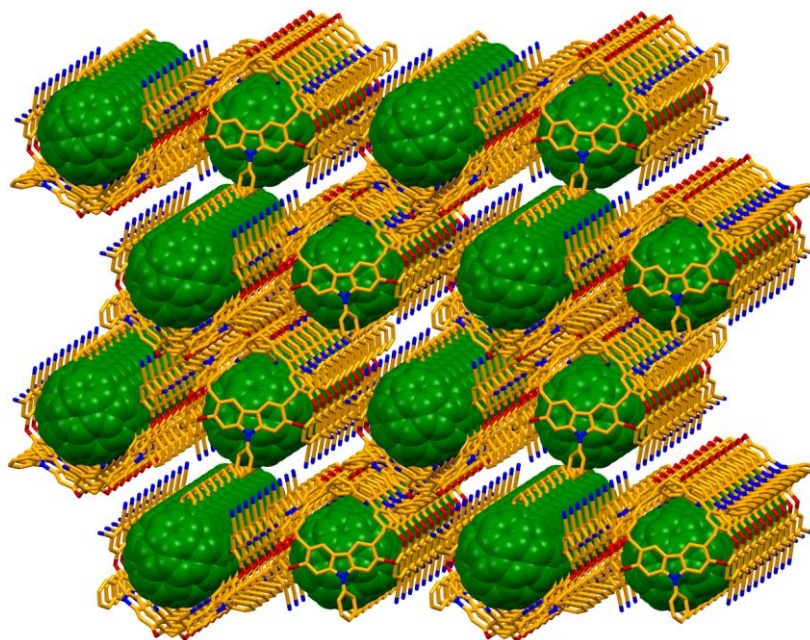

**Fig. S28** The tubular packing structure of complexes  $C_{60}@2$ .

(a)

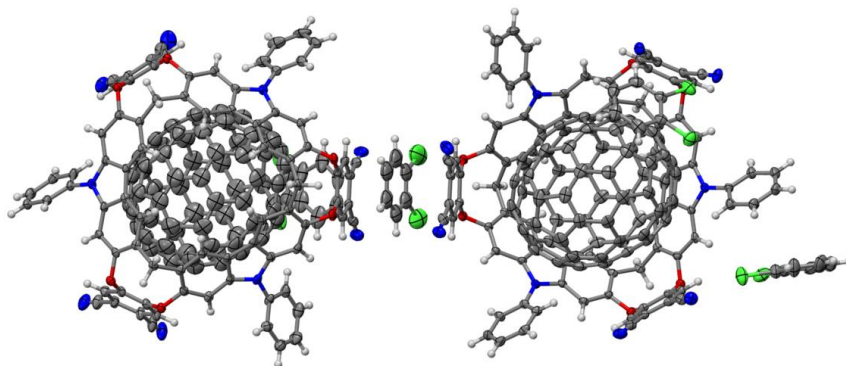

(b)

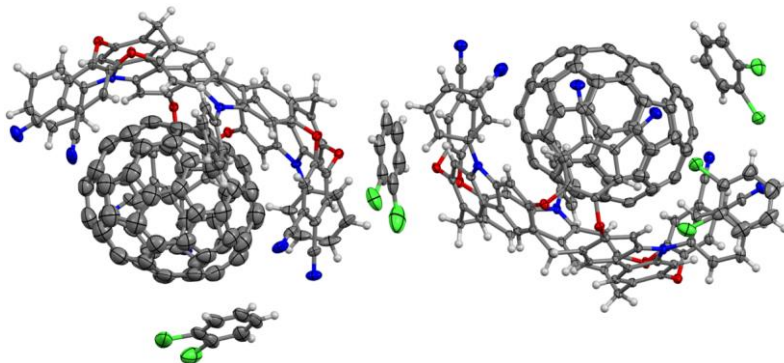

**Fig. S29** ORTEP drawing of  $C_{70}@2$  from (a) top view and (b) side view (the thermal ellipsoids are displayed at a 30 % probability).

**Table S4.** X-ray crystallographic and the refinement data of **C<sub>70</sub>@2**

| CCDC                                        | 2305716                                                                        |
|---------------------------------------------|--------------------------------------------------------------------------------|
| Empirical formula                           | C <sub>163</sub> H <sub>47</sub> Cl <sub>4</sub> N <sub>9</sub> O <sub>6</sub> |
| Formula weight                              | 2368.89                                                                        |
| Temperature/K                               | 169.99(10)                                                                     |
| Crystal system                              | monoclinic                                                                     |
| Space group                                 | P2 <sub>1</sub> /n                                                             |
| a/Å                                         | 26.5926(7)                                                                     |
| b/Å                                         | 32.9430(7)                                                                     |
| c/Å                                         | 30.1206(12)                                                                    |
| $\alpha$ /°                                 | 90                                                                             |
| $\beta$ /°                                  | 113.007(4)                                                                     |
| $\gamma$ /°                                 | 90                                                                             |
| Volume/Å <sup>3</sup>                       | 24288.0(14)                                                                    |
| Z                                           | 8                                                                              |
| $\rho$ calc/g/cm <sup>3</sup>               | 1.296                                                                          |
| $\mu$ /mm <sup>-1</sup>                     | 1.417                                                                          |
| F(000)                                      | 9632.0                                                                         |
| Crystal size/mm <sup>3</sup>                | 0.42 × 0.39 × 0.37                                                             |
| Radiation                                   | CuK $\alpha$ ( $\lambda$ = 1.54184)                                            |
| 2 $\Theta$ range for data collection/°      | 4.498 to 152.092                                                               |
| Index ranges                                | -32 ≤ h ≤ 32, -30 ≤ k ≤ 41, -37 ≤ l ≤ 37                                       |
| Reflections collected                       | 175708                                                                         |
| Independent reflections                     | 48649 [R <sub>int</sub> = 0.1184, R <sub>sigma</sub> = 0.1032]                 |
| Data/restraints/parameters                  | 48649/1187/3277                                                                |
| Goodness-of-fit on F <sup>2</sup>           | 1.395                                                                          |
| Final R indexes [I ≥ 2 $\sigma$ (I)]        | R <sub>1</sub> = 0.1108, wR <sub>2</sub> = 0.2615                              |
| Final R indexes [all data]                  | R <sub>1</sub> = 0.2002, wR <sub>2</sub> = 0.2962                              |
| Largest diff. peak/hole / e Å <sup>-3</sup> | 0.96/-0.63                                                                     |



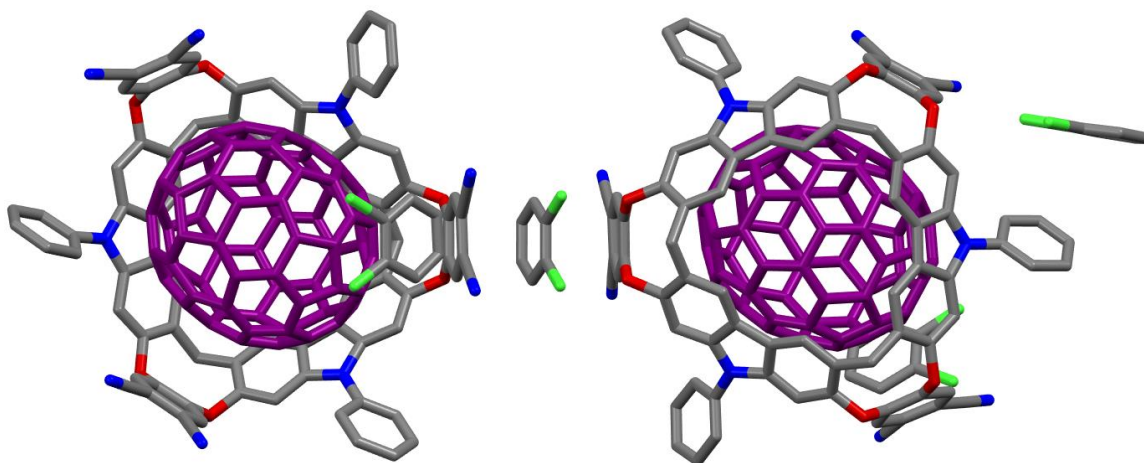

**Fig. S30** Crystal structure of complexes  $C_{70}@2$  with four *o*-DCBs around from top view.

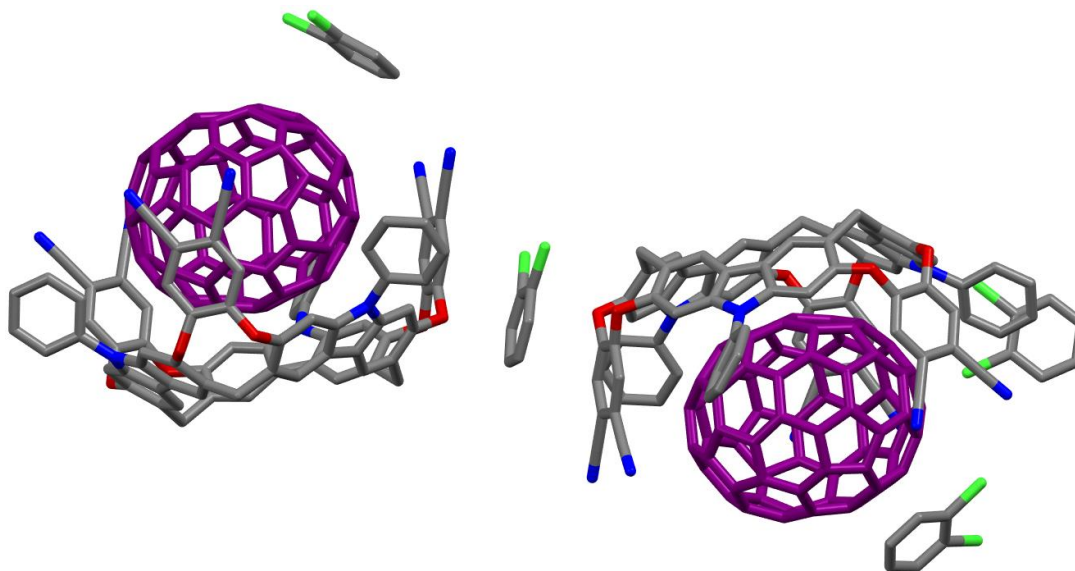

**Fig. S31** Crystal structure of complexes  $C_{70}@2$  with four *o*-DCBs around from side view.

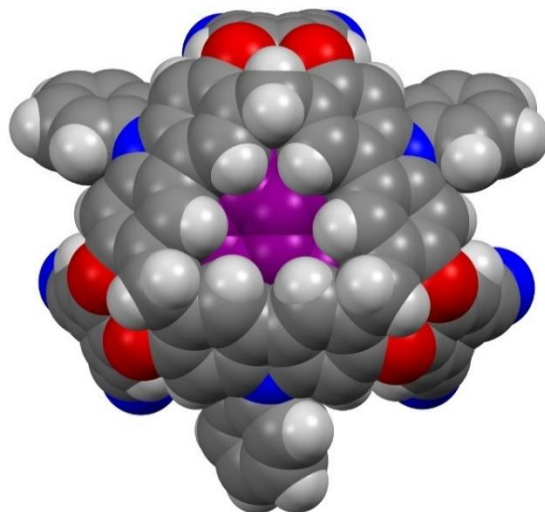

**Fig. S32** Space-filling model of the 1:1 complexation between **2** and C<sub>70</sub> from top view.

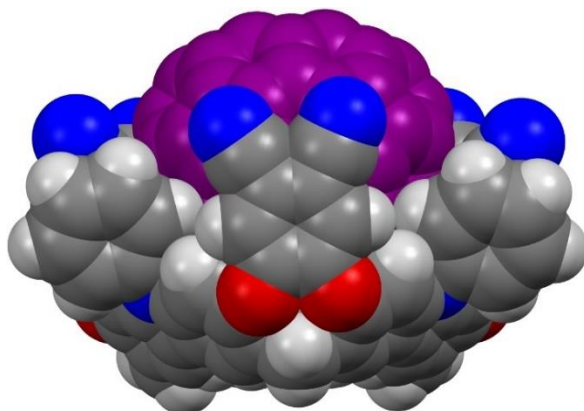

**Fig. S33** Space-filling model of the 1:1 complexation between **2** and C<sub>70</sub> from side view.

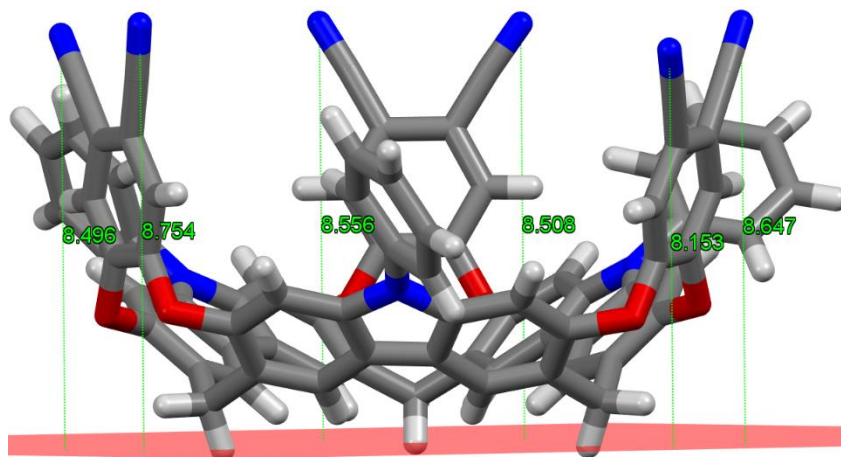

**Fig. S34** Side view of **2** showing the cavity depth.

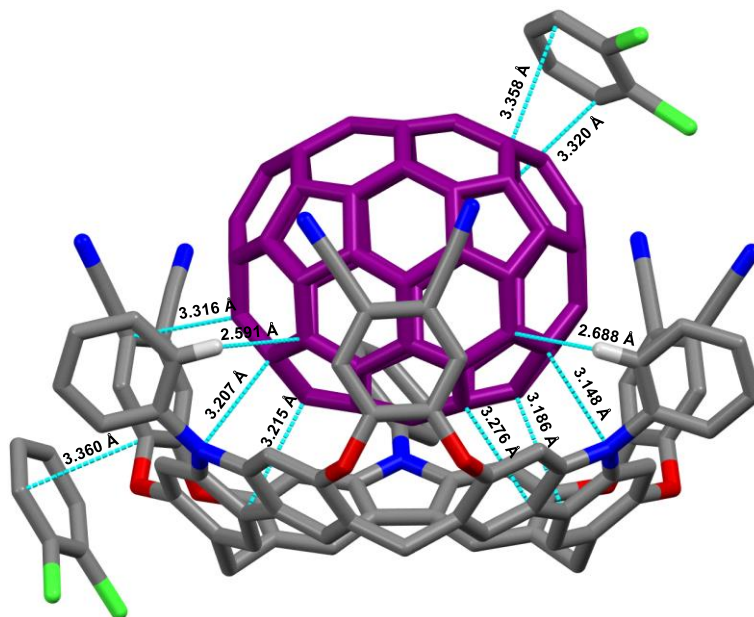

**Fig. S35** The multiple intermolecular interactions between **2** and encapsulated  $C_{70}$  molecule and *o*-DCBs.

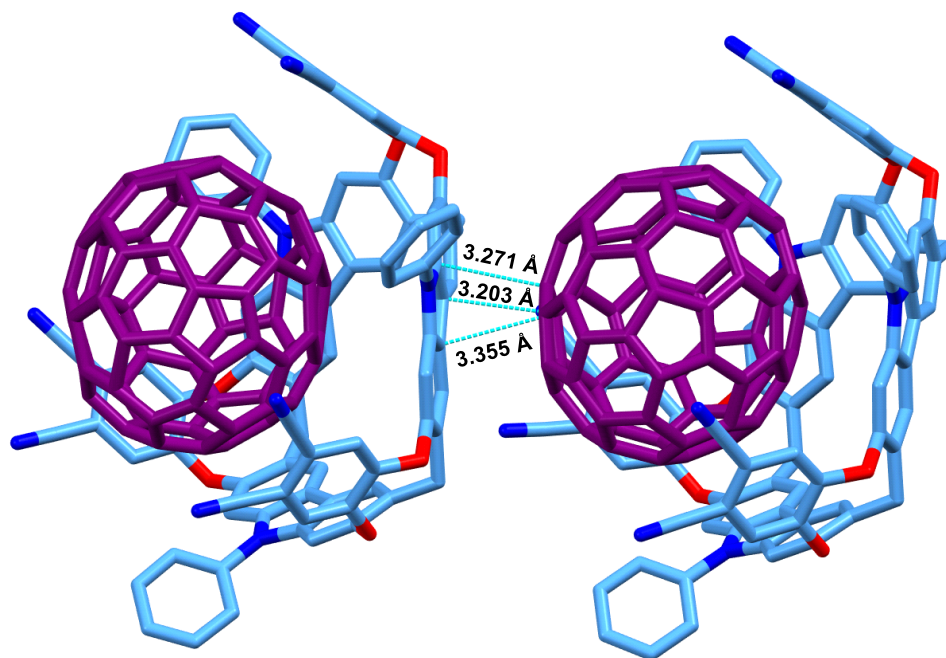

**Fig. S36** The multiple intermolecular  $\pi \cdots \pi$  interactions of two adjacent complexes  $C_{70}@2$ .

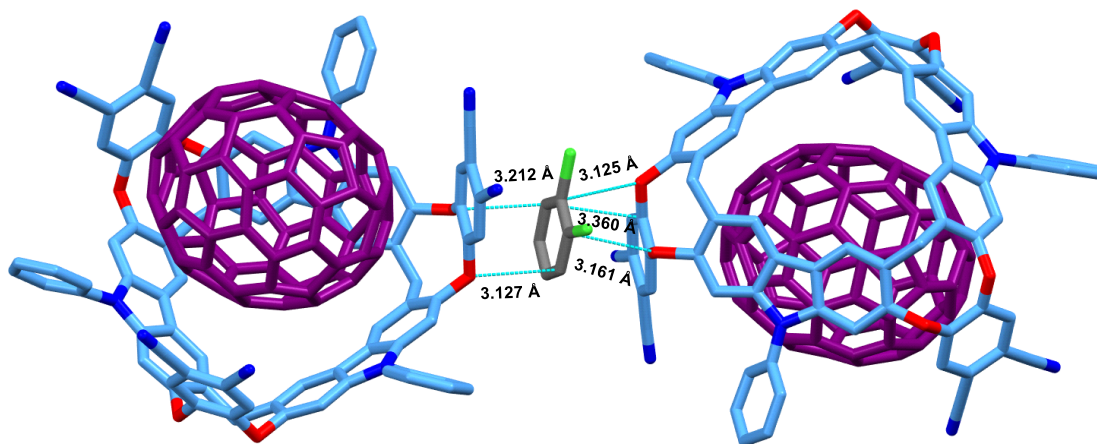

**Fig. S37** The multiple intermolecular interactions between two adjacent complexes  $C_{70}@2$  and *o*-DCB.

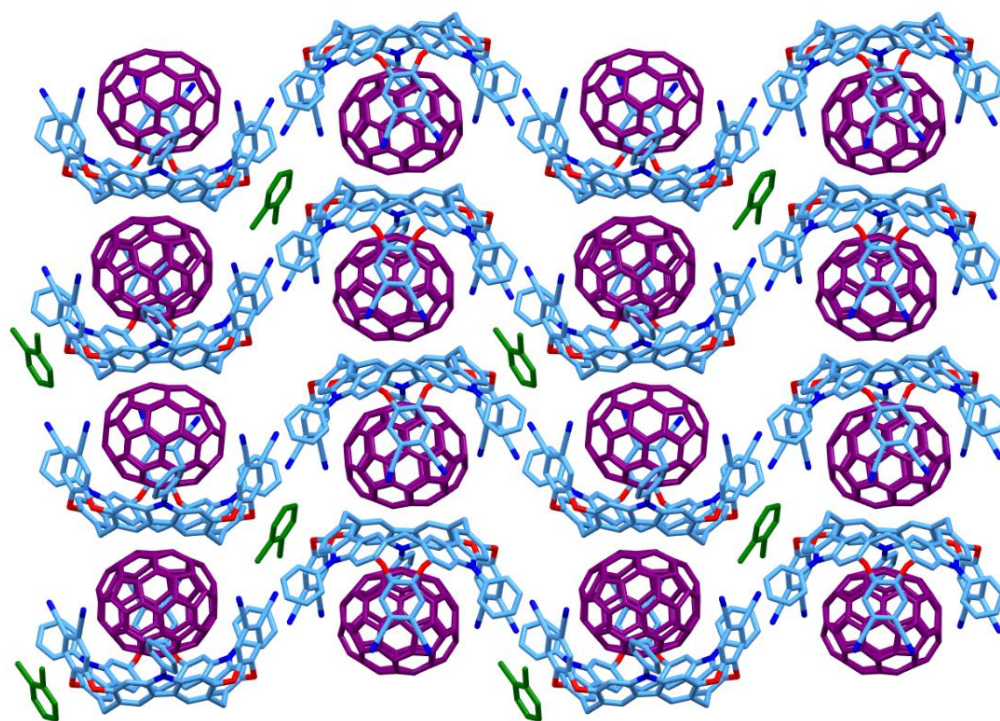

**Fig. S38** The packing mode of complexes  $C_{70}@2$  containing *o*-DCBs viewed along *c* axis.



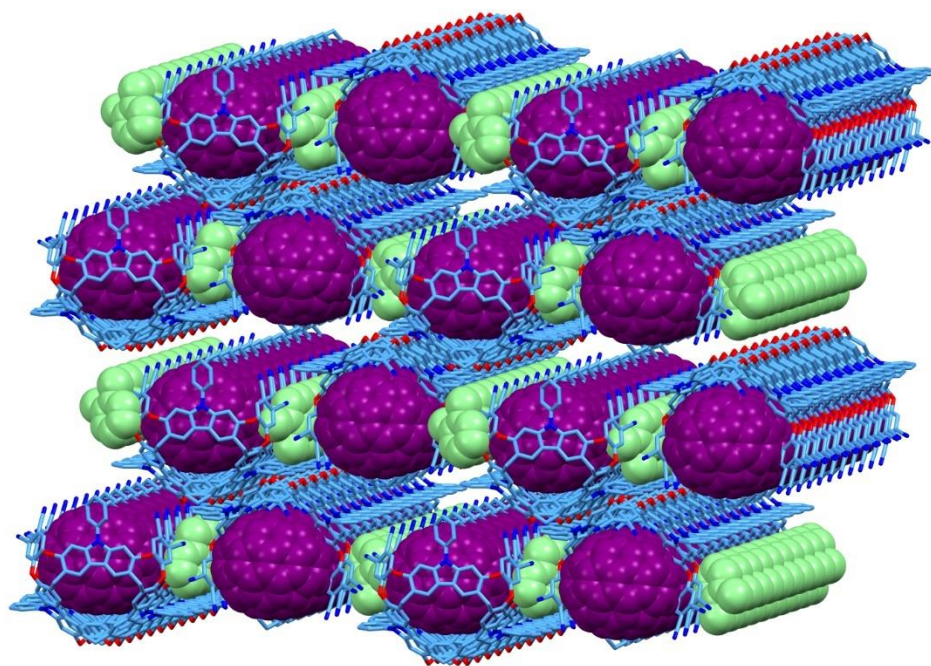

**Fig. S39** The tubular packing structure of complexes  $C_{70}@2$  containing *o*-DCBs.

## 5. Photophysical properties

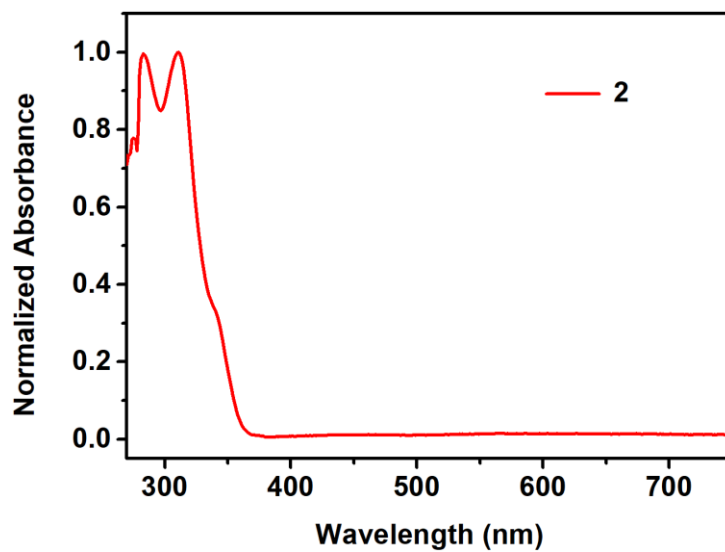

**Fig. S40** UV-vis absorption spectrum of **2** ( $c = 1.0 \times 10^{-5}$  M) in toluene at 298 K.

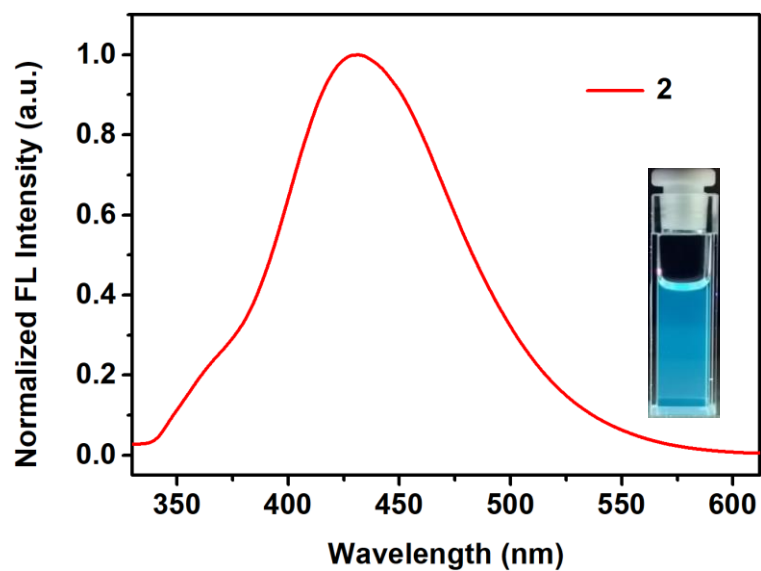

**Fig. S41** Fluorescence spectrum of **2** ( $c = 1.0 \times 10^{-5}$  M, excited at 311 nm) in toluene at 298 K.

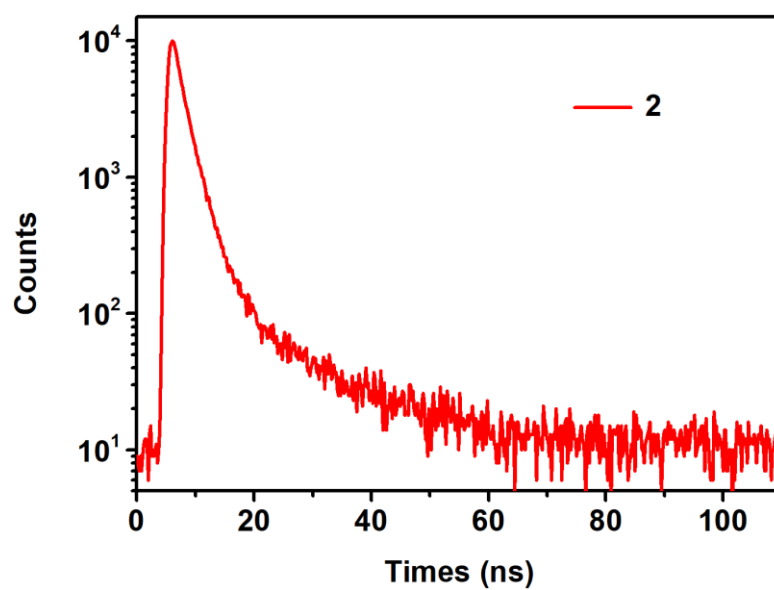

**Fig. S42** Transient decay spectrum of **2** ( $c = 1.0 \times 10^{-5}$  mol/L) in toluene at 298 K.

## 6. Electrochemical measurements

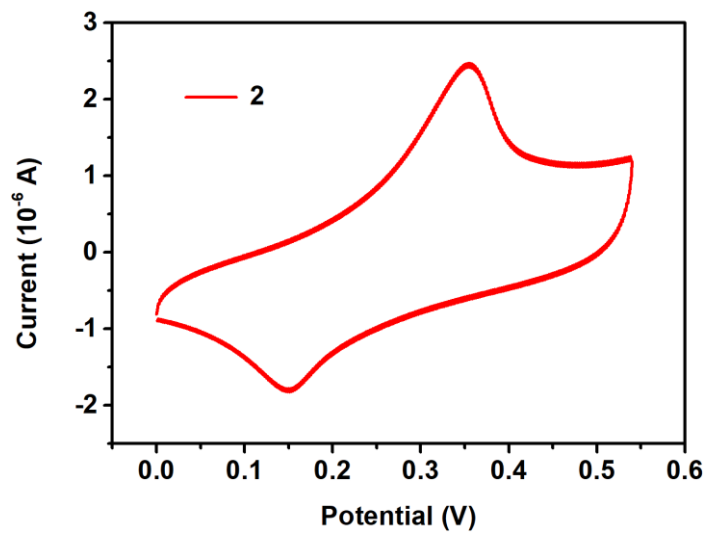

**Fig. S43** Cyclic voltammogram of **2** in  $\text{CH}_2\text{Cl}_2$  containing 0.1 M  $n\text{-Bu}_4\text{NPF}_6$  at room temperature at a scan rate of 0.1 V/s.

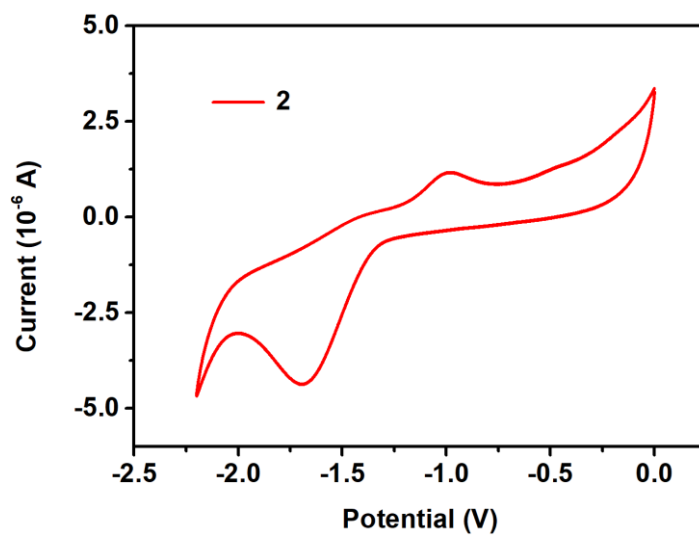

**Fig. S44** Cyclic voltammogram of **2** in THF containing 0.1 M  $n\text{-Bu}_4\text{NPF}_6$  at room temperature at a scan rate of 0.1 V/s.

## 7. UV-vis absorption spectra studies of complexations

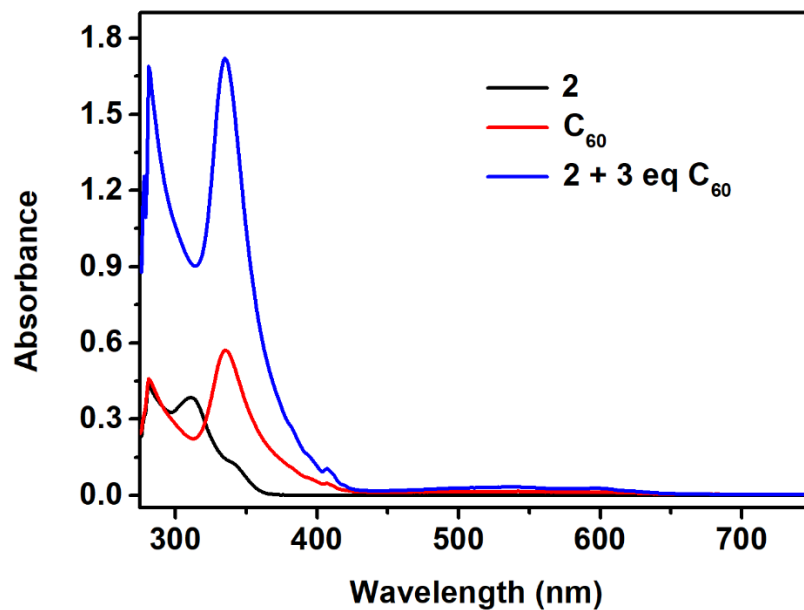

**Fig. S45** UV-vis absorption spectra of C<sub>60</sub> and **2** ( $1.0 \times 10^{-5}$  M) in the absence and presence of C<sub>60</sub> (3 equiv.) in toluene.

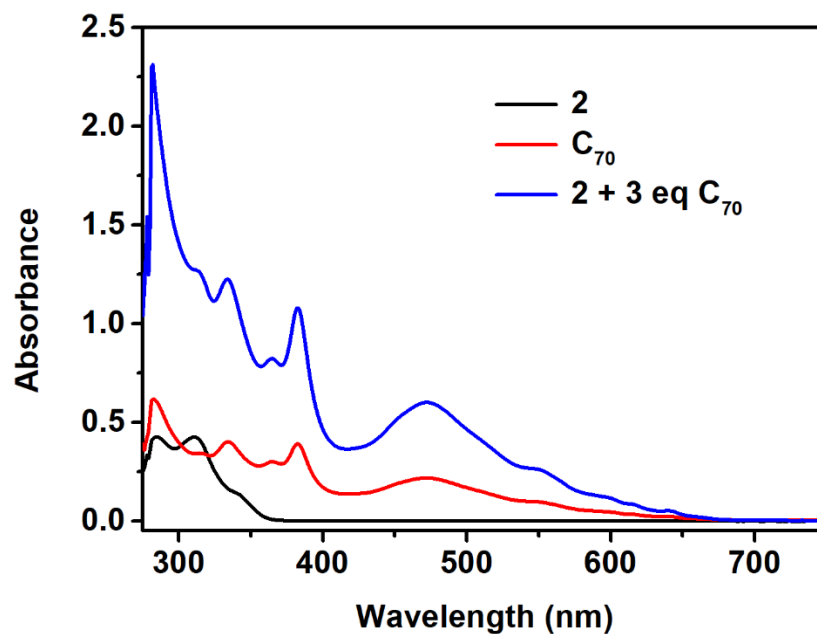

**Fig. S46** UV-vis absorption spectra of C<sub>70</sub> and **2** ( $1.0 \times 10^{-5}$  M) in the absence and presence of C<sub>70</sub> (3 equiv.) in toluene.

## 8. MALDI-TOF mass spectra studies of complexations

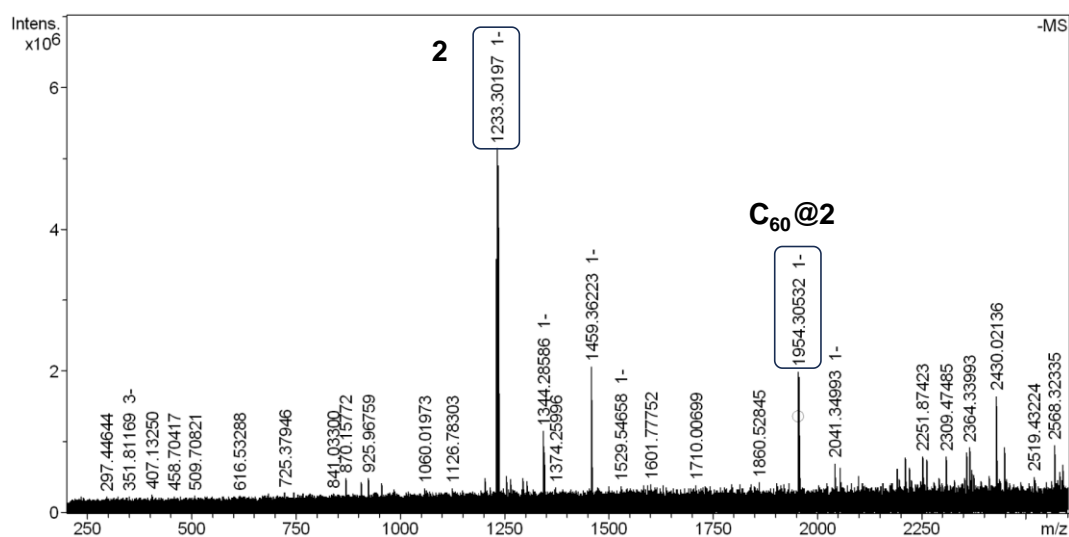

Fig. S47 MALDI-TOF mass spectrum of complex  $C_{60}@2$ .

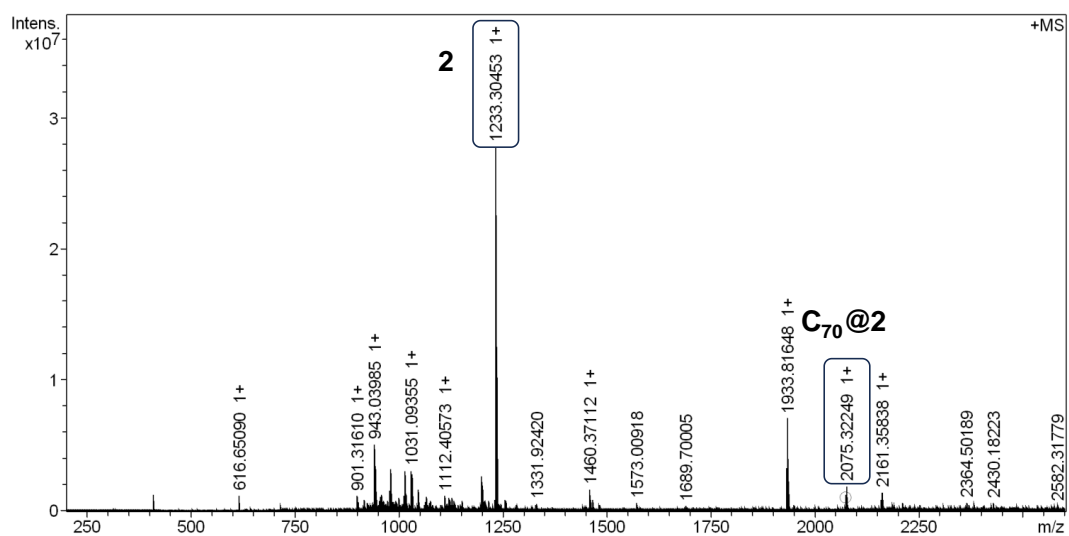

Fig. S48 MALDI-TOF mass spectrum of complex  $C_{70}@2$ .

## 9. Color changes of complexations

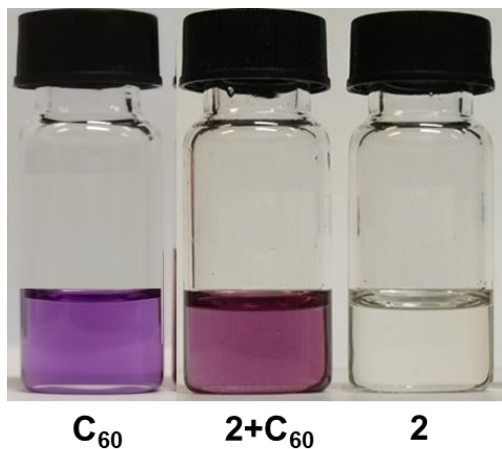

**Fig. S49** Solution of C<sub>60</sub> (left), C<sub>60</sub> mixed with one equivalent of **2** (mid) and **2** (right),  $1.0 \times 10^{-3}$  M in toluene.

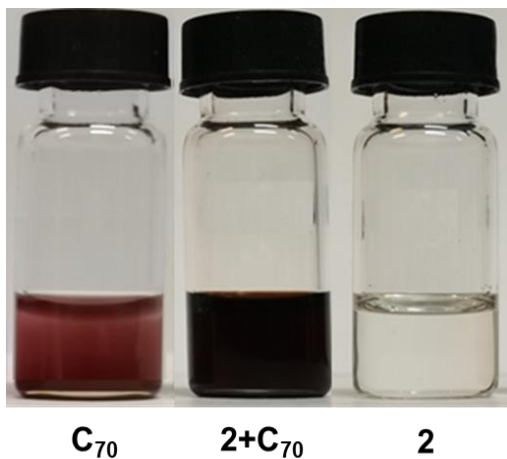

**Fig. S50** Solution of C<sub>70</sub> (left), C<sub>70</sub> mixed with one equivalent of **2** (mid) and **2** (right),  $1.0 \times 10^{-3}$  M in toluene.

## 10. Determination of the association constants

Fluorescence titration experiments were performed at 298 K. A stock solution of the cavitand **2** ( $1.0 \times 10^{-4}$  M in toluene) was mixed with a stock solution of fullerenes C<sub>60</sub> and C<sub>70</sub> ( $1.0 \times 10^{-3}$  M in toluene) to give samples with a concentration of  $[H] = 1.0 \times 10^{-5}$  M (for **2**) and  $[G] = (0-3) \times 10^{-5}$  M (for the corresponding fullerene). The emission spectra (excited at 311 nm) were measured for each sample, and the emission at 431 nm was monitored and fitted to a binding isotherm using Bindfit.<sup>S4-6</sup> The

resulting fits were used to calculate  $K_a$  values in addition to an error margin for 95% confidence of fit.

### Titration of fullerene C<sub>60</sub> with cavitand 2

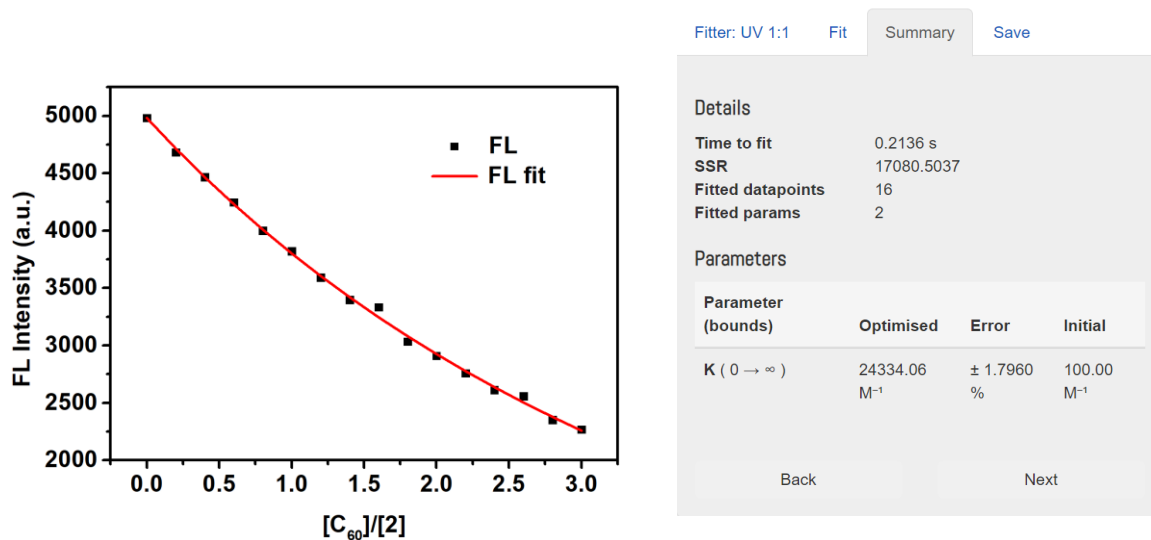

Fig. S51 Nonlinear fitting curve (left) and association constant (right) for host **2** and guest C<sub>60</sub>.

### Titration of fullerene C<sub>70</sub> with cavitand 2

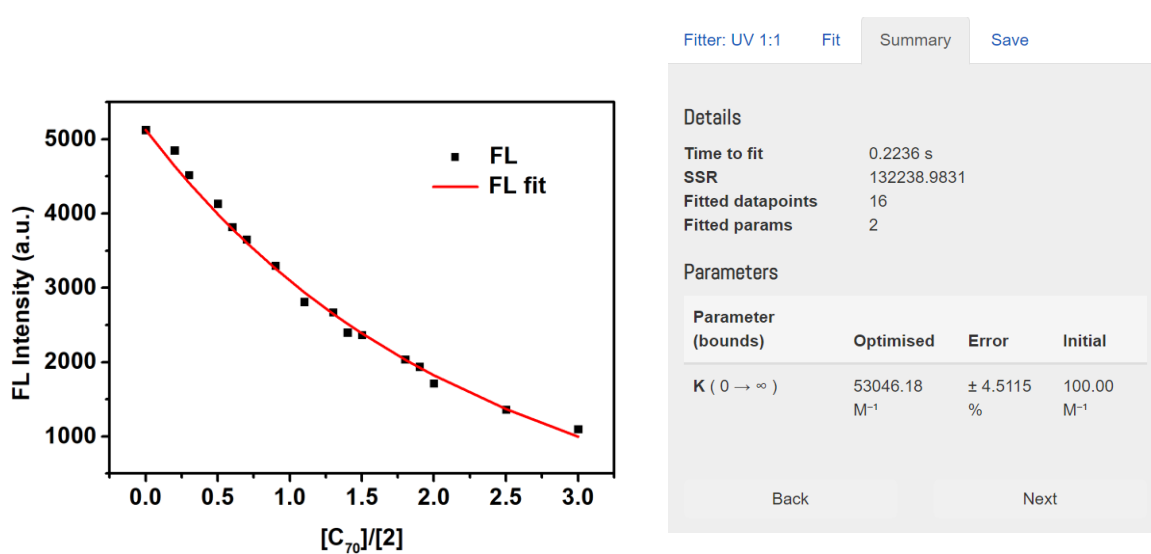

Fig. S52 Nonlinear fitting curve (left) and association constant (right) for host **2** and guest C<sub>70</sub>.

## 11. Theoretical calculations

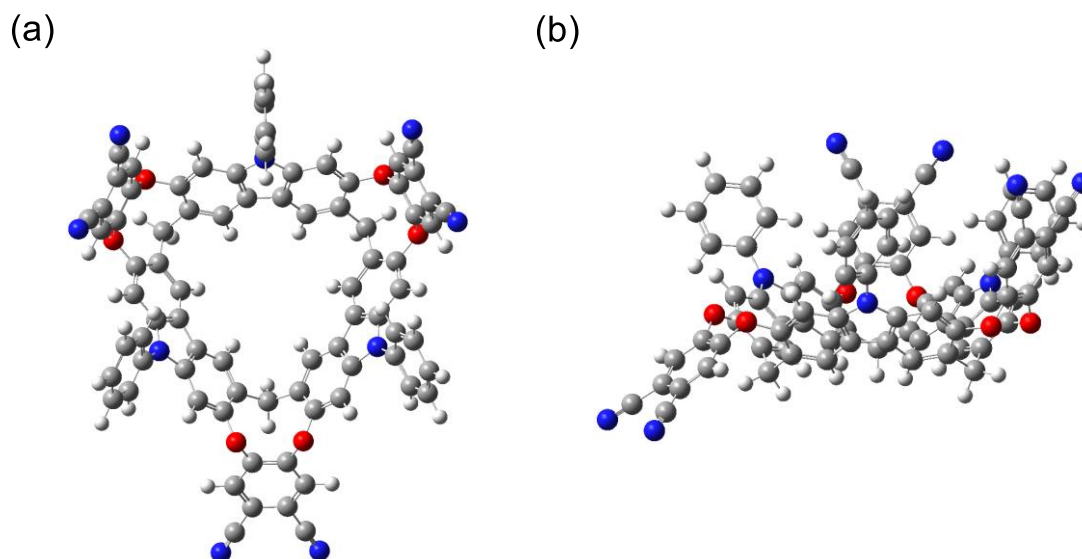

**Fig. S53** Optimized structure of **2-c1** from (a) top view and (b) side view at the B3LYP/6-31G(d) level of theory.

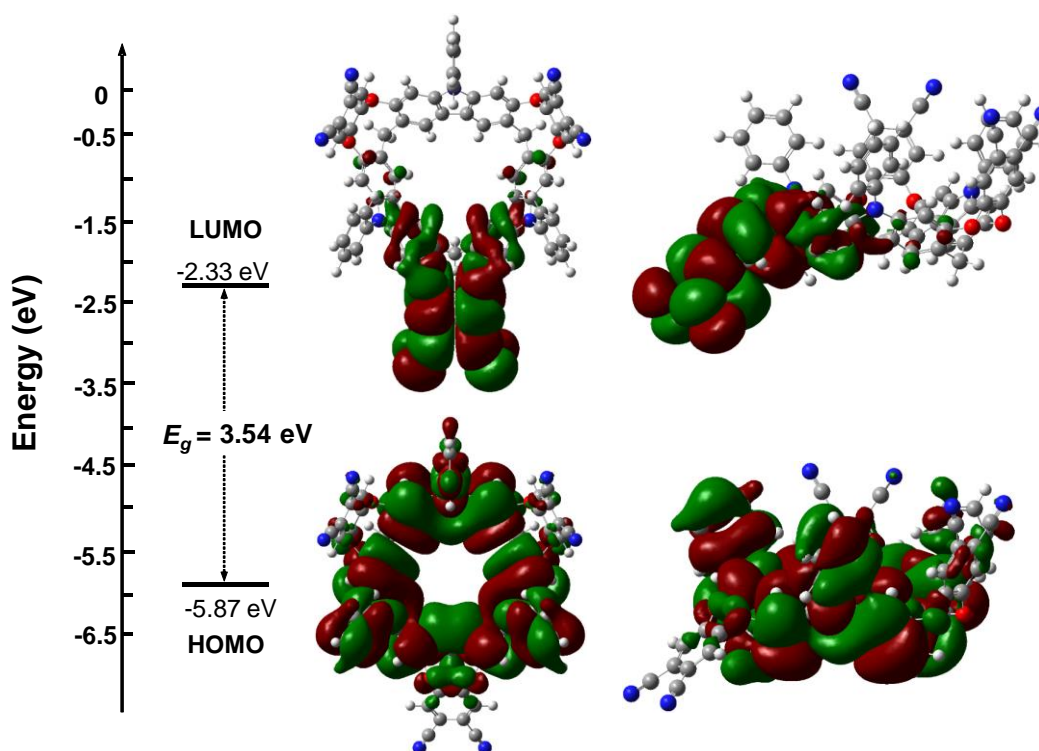

**Fig. S54** Frontier molecular orbitals and HOMO-LUMO energy gap of **2-c1** calculated at the B3LYP/6-31G(d) level of theory.



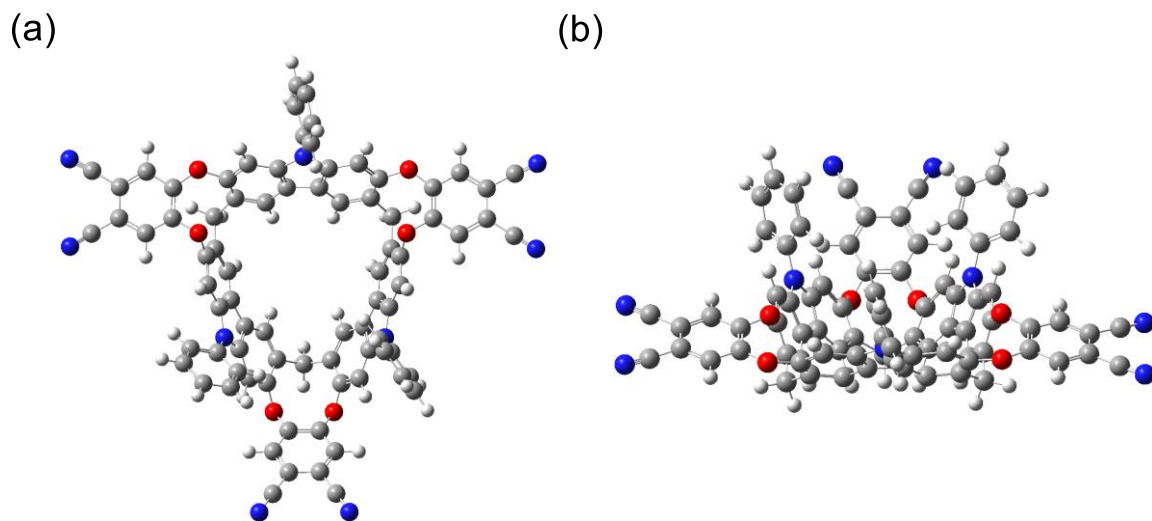

**Fig. S55** Optimized structure of **2-c2** from (a) top view and (b) side view at the B3LYP/6-31G(d) level of theory.

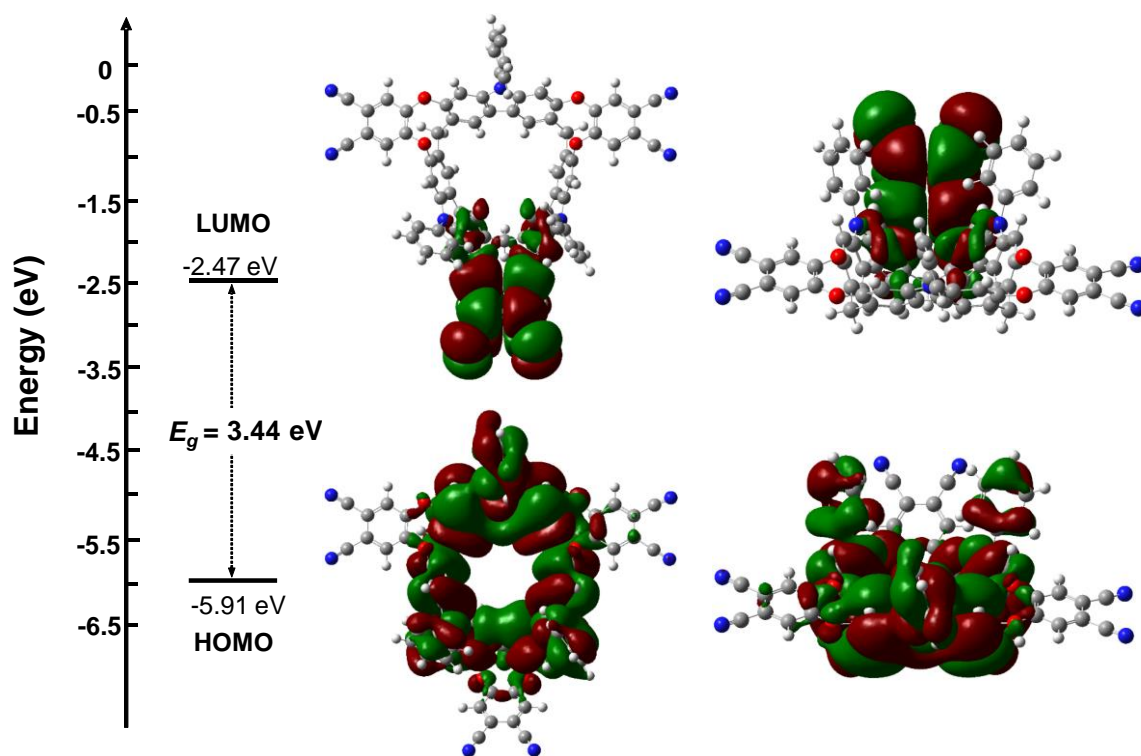

**Fig. S56** Frontier molecular orbitals and HOMO-LUMO energy gap of **2-c2** calculated at the B3LYP/6-31G(d) level of theory.

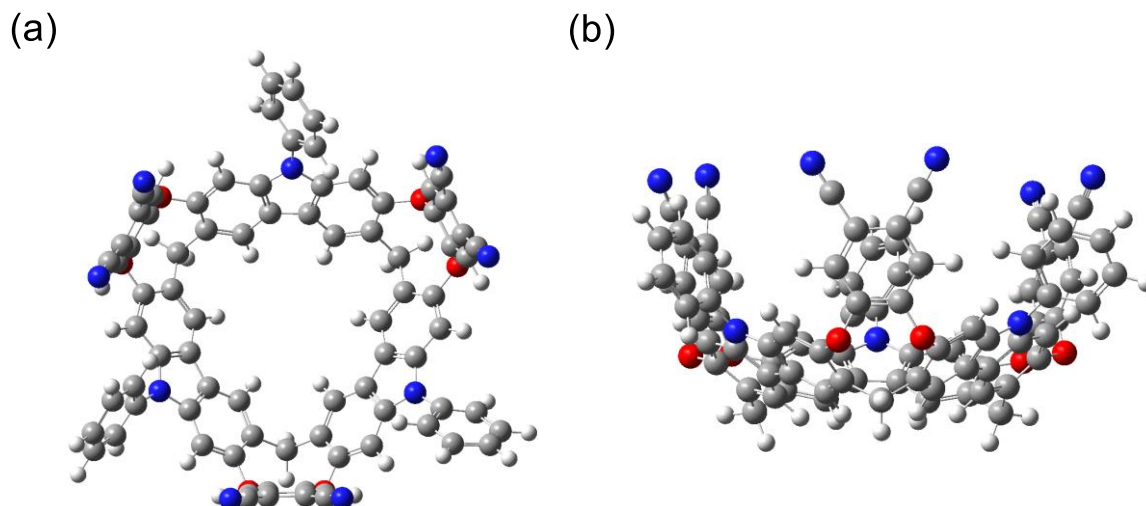

**Fig. S57** Optimized structure of **2-c3** from (a) top view and (b) side view at the B3LYP/6-31G(d) level of theory.

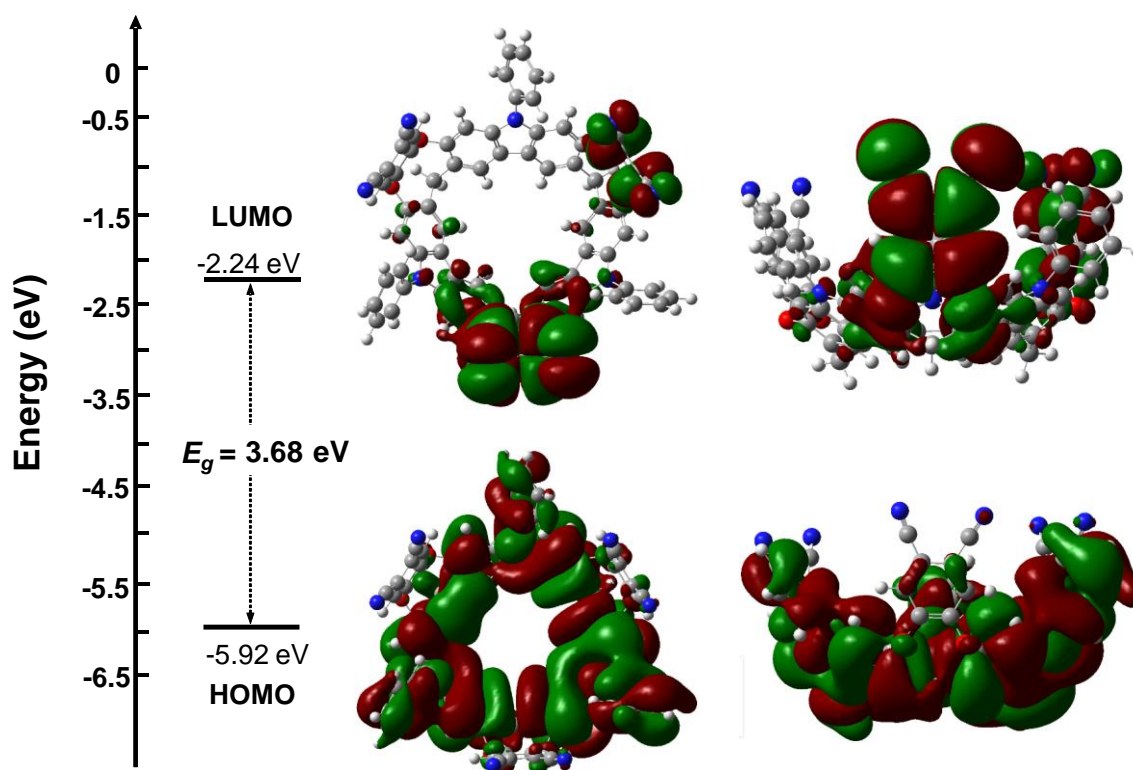

**Fig. S58** Frontier molecular orbitals and HOMO-LUMO energy gap of **2-c3** calculated at the B3LYP/6-31G(d) level of theory.

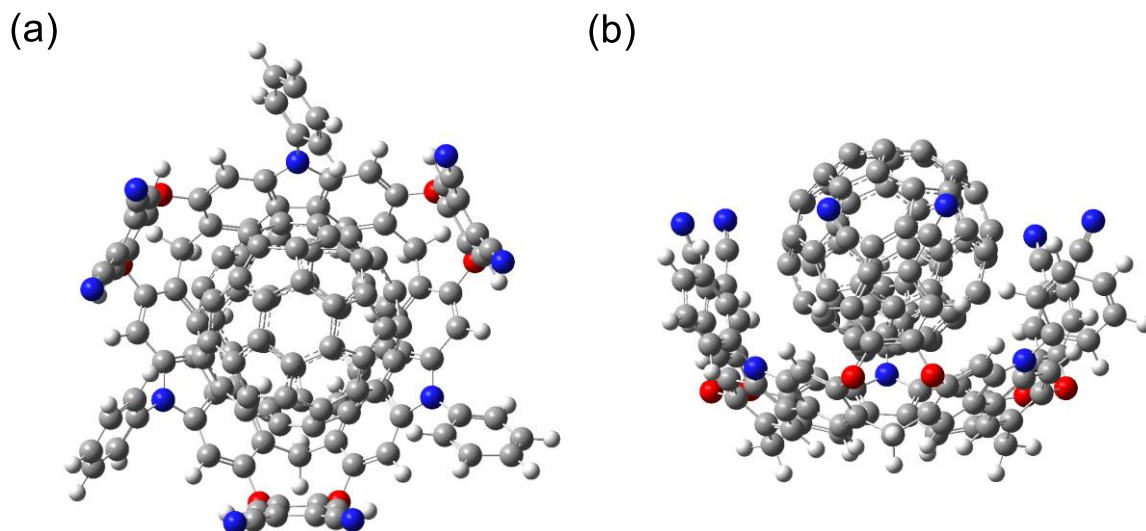

**Fig. S59** Optimized structure of C<sub>60</sub>@2 from (a) top view and (b) side view at the B3LYP/6-31G(d) level of theory.

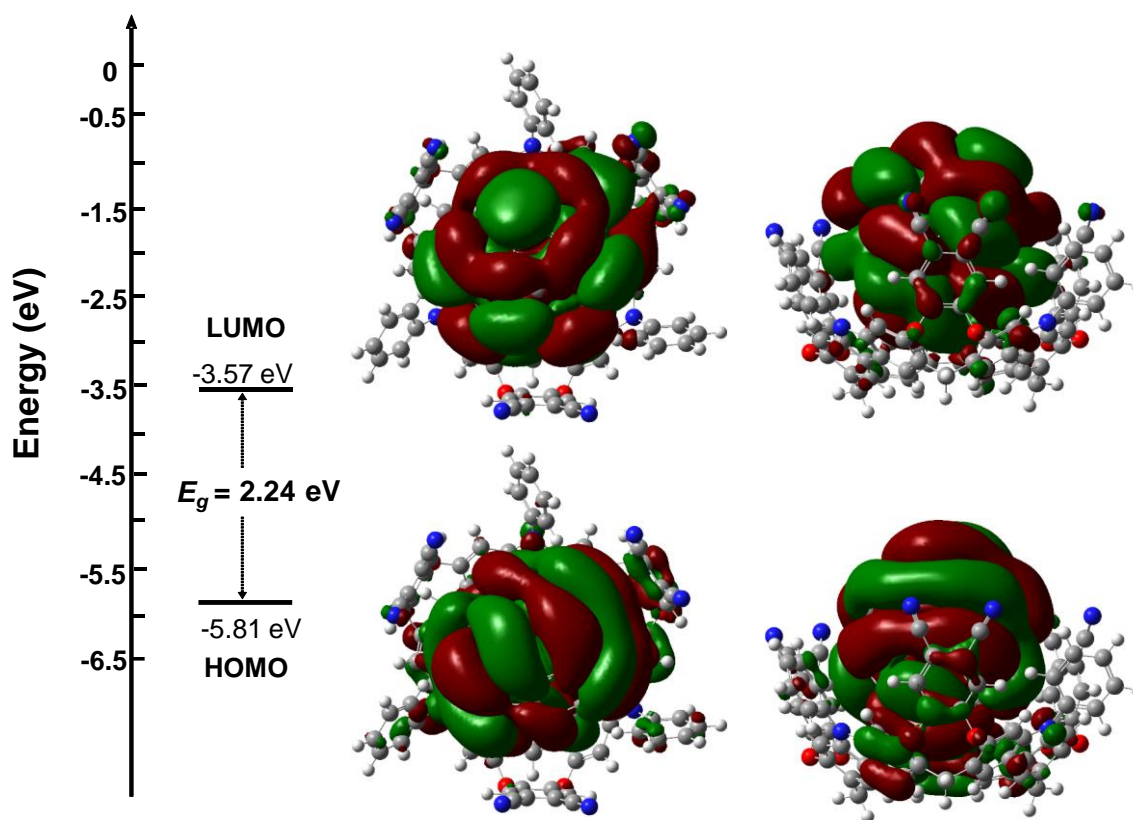

**Fig. S60** Frontier molecular orbitals and HOMO-LUMO energy gap of C<sub>60</sub>@2 calculated at the B3LYP/6-31G(d) level of theory.

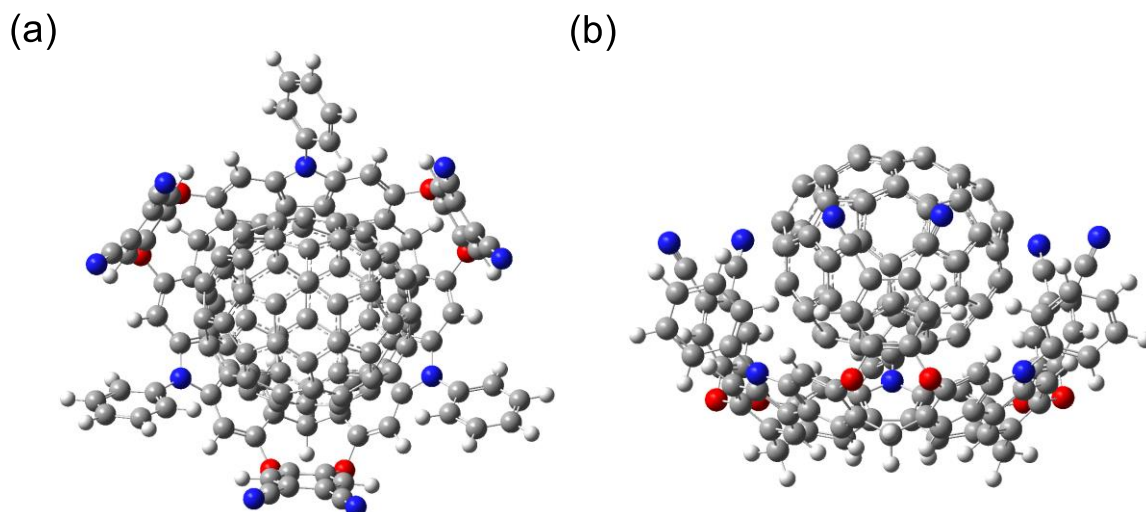

**Fig. S61** Optimized structure of  $C_{70}@2$  from (a) top view and (b) side view at the B3LYP/6-31G(d) level of theory.

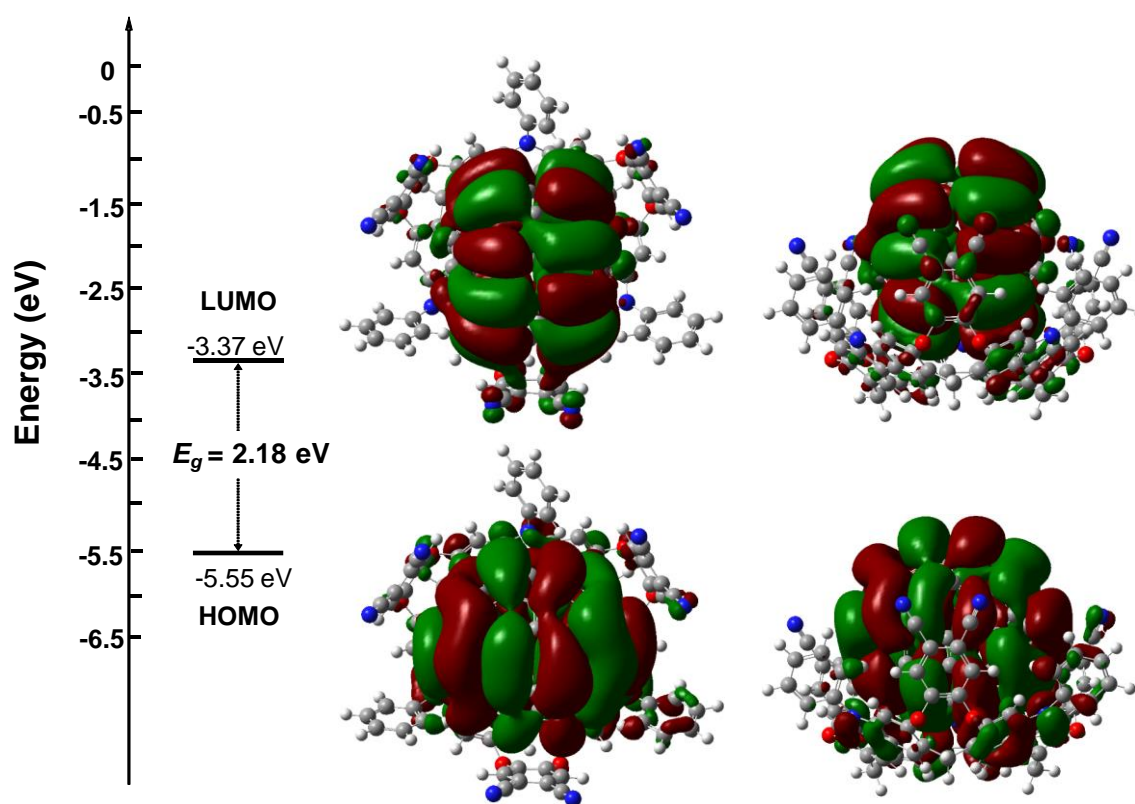

**Fig. S62** Frontier molecular orbitals and HOMO-LUMO energy gap of  $C_{70}@2$  calculated at the B3LYP/6-31G(d) level of theory.



### Electrostatic potential (ESP) calculations

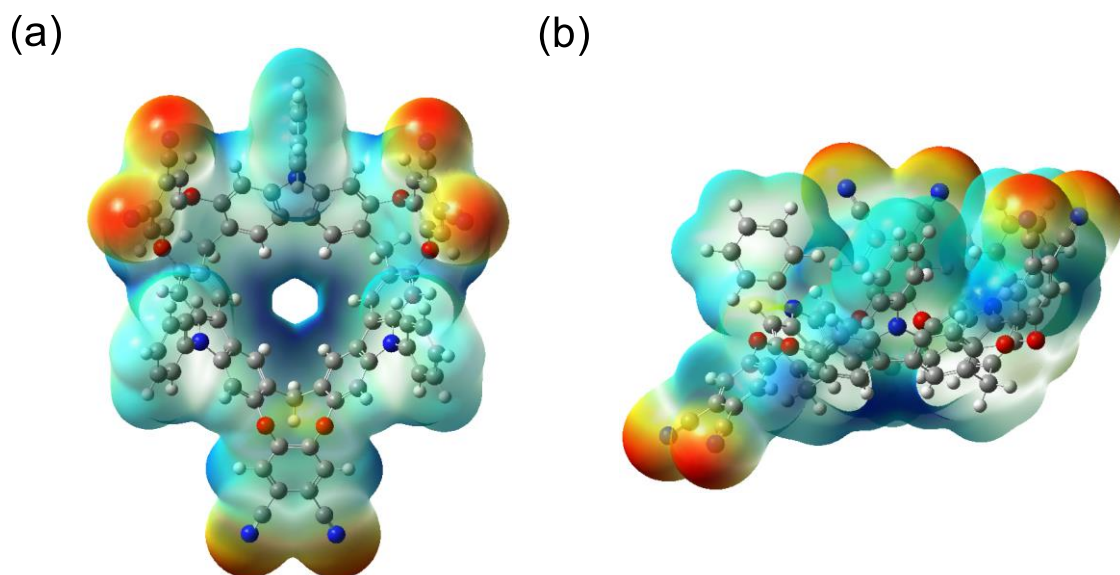

**Fig. S63** Electrostatic potential (ESP) map of **2-c1** from (a) top view and (b) side view.

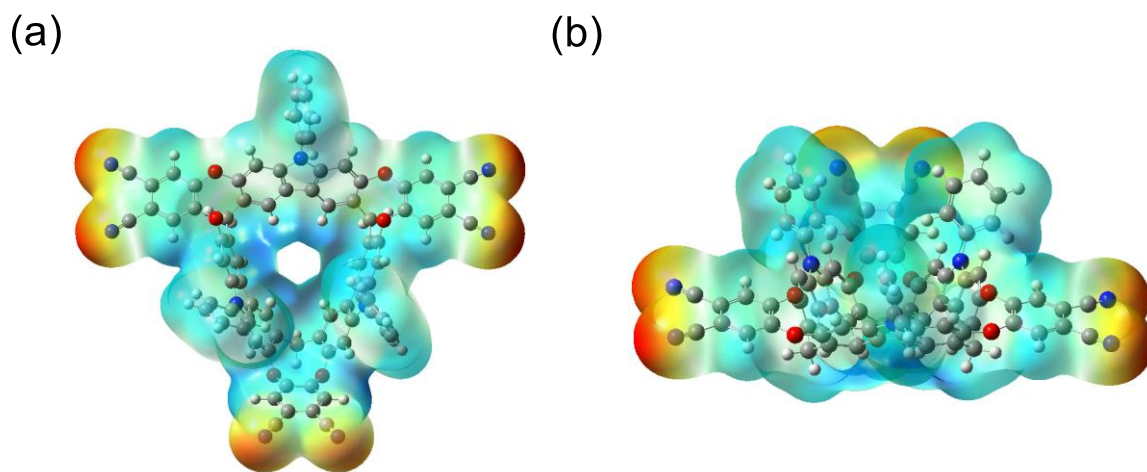

**Fig. S64** Electrostatic potential (ESP) map of **2-c2** from (a) top view and (b) side view.

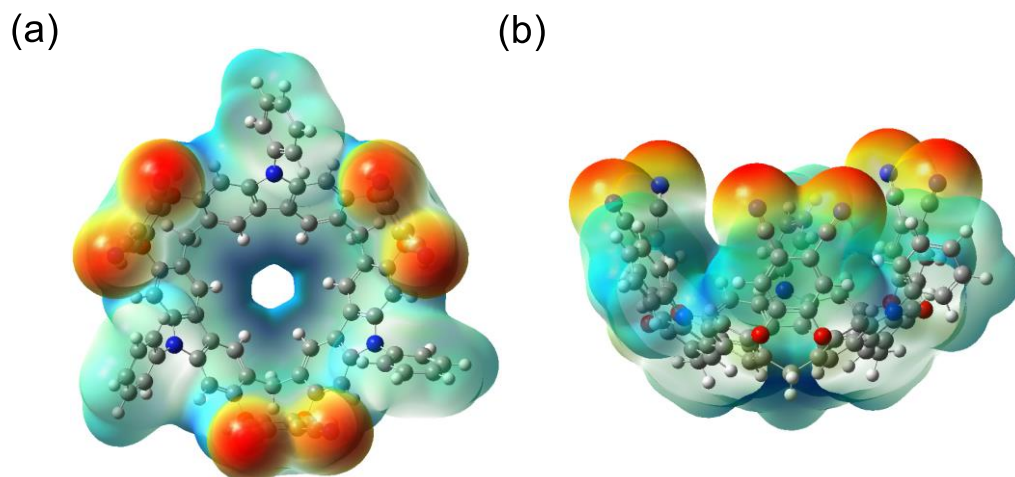

**Fig. S65** Electrostatic potential (ESP) map of **2-c3** from (a) top view and (b) side view.

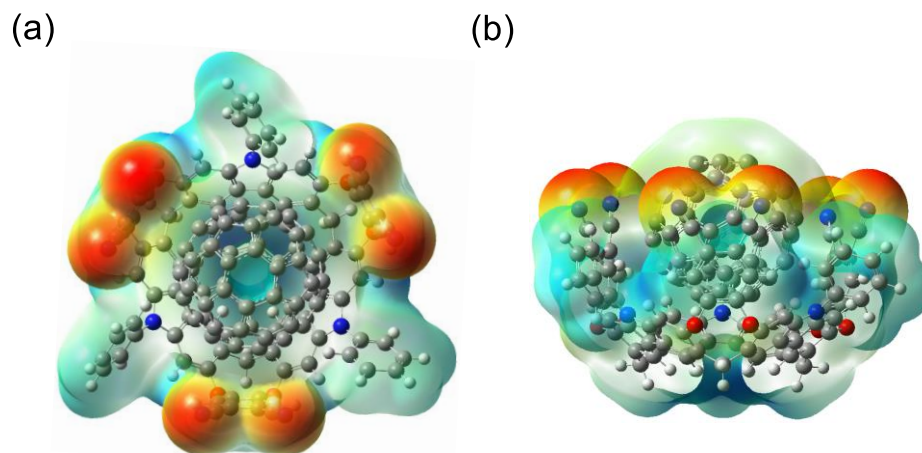

**Fig. S66** Electrostatic potential (ESP) map of **C<sub>60</sub>@2** from (a) top view and (b) side view.

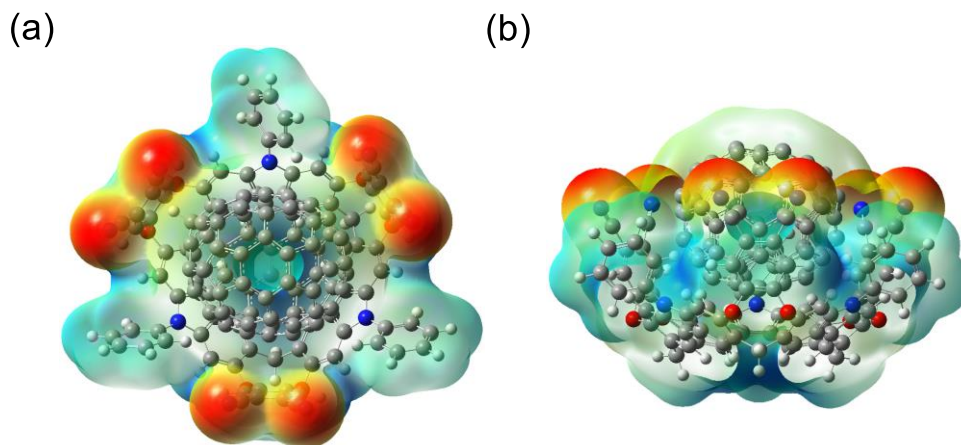

**Fig. S67** Electrostatic potential (ESP) map of **C<sub>70</sub>@2** from (a) top view and (b) side view.



## Independent gradient model (IGM) analysis

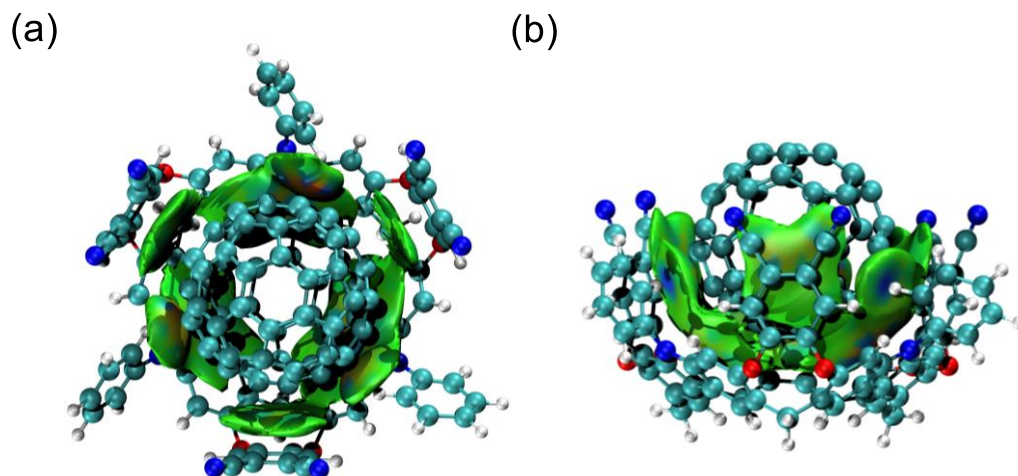

Fig. S68 Independent gradient model (IGM) analysis of C<sub>60</sub>@2 from (a) top view and (b) side view.

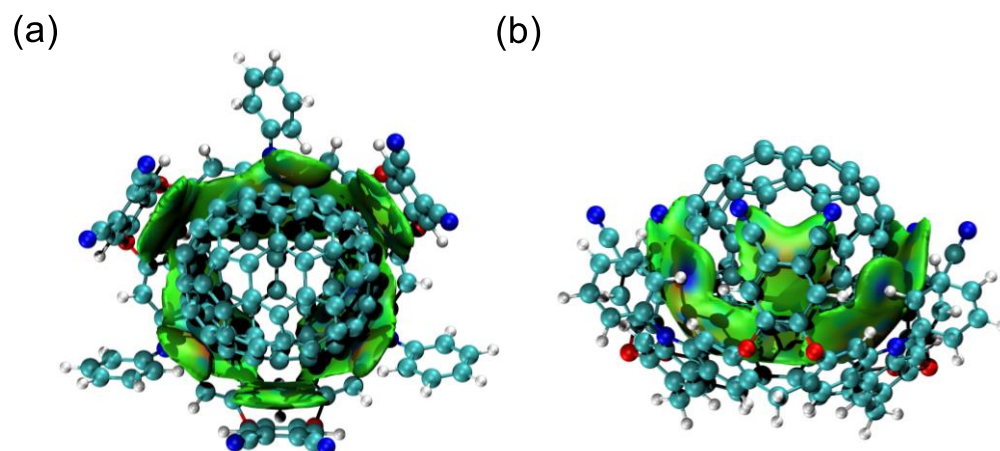

Fig. S69 Independent gradient model (IGM) analysis of C<sub>70</sub>@2 from (a) top view and (b) side view.

## 12. Cartesian coordinates of the optimized structure

### 2-c1

|   |        |         |         |   |         |         |         |
|---|--------|---------|---------|---|---------|---------|---------|
| O | 8.2653 | 9.1036  | 1.2926  | C | 4.8822  | 12.6237 | 9.2806  |
| O | 7.7543 | 7.7748  | 3.6502  | C | 4.014   | 13.8778 | 9.4098  |
| O | 5.679  | 12.5317 | 11.5993 | H | 3.3215  | 13.8778 | 8.7023  |
| N | 9.418  | 13.8778 | 0.8561  | H | 3.5576  | 13.8778 | 10.2883 |
| N | 7.5009 | 9.5121  | 8.2539  | C | 8.7198  | 12.7609 | 1.2571  |
| C | 8.0725 | 10.4908 | 1.5241  | C | 7.3024  | 8.6699  | 4.6399  |
| N | 0.7379 | 11.902  | 14.7376 | C | 6.8773  | 10.8527 | 2.1835  |
| C | 6.6797 | 10.5338 | 8.7886  | C | 10.7694 | 13.8778 | 0.3751  |

|   |         |         |         |
|---|---------|---------|---------|
| N | 13.9952 | 8.0245  | 1.116   |
| C | 6.251   | 10.344  | 6.5372  |
| C | 4.6109  | 13.18   | 12.1445 |
| C | 5.659   | 12.0437 | 10.2866 |
| C | 5.9639  | 9.8161  | 2.8008  |
| H | 5.025   | 10.1257 | 2.7488  |
| H | 6.037   | 8.966   | 2.2987  |
| C | 8.9826  | 11.3921 | 1.0346  |
| H | 9.7578  | 11.1071 | 0.5653  |
| C | 5.8951  | 11.0354 | 7.7555  |
| C | 7.2458  | 9.4246  | 6.8845  |
| C | 6.6361  | 12.1994 | 2.3812  |
| H | 5.8493  | 12.4697 | 2.8399  |
| C | 7.5239  | 13.1657 | 1.921   |
| C | 5.0145  | 12.0945 | 8.0024  |
| H | 4.5017  | 12.4554 | 7.2888  |
| C | 6.3437  | 9.5895  | 4.2386  |
| C | 9.293   | 8.518   | 2.0022  |
| C | 2.571   | 13.1756 | 13.4047 |
| C | 7.776   | 8.5442  | 5.931   |
| H | 8.4287  | 7.8936  | 6.1616  |
| C | 6.5764  | 11.0198 | 10.086  |
| H | 7.1031  | 10.6718 | 10.7958 |
| C | 10.5825 | 8.5259  | 1.4678  |
| H | 10.7468 | 8.9412  | 0.6293  |
| C | 5.793   | 10.4456 | 5.2325  |
| H | 5.1211  | 11.0777 | 5.0055  |
| C | 13.389  | 13.8778 | -0.5165 |
| H | 14.2862 | 13.8778 | -0.8288 |
| C | 11.6252 | 7.9265  | 2.1623  |
| C | 9.0462  | 7.8879  | 3.2113  |
| C | 3.6078  | 12.4696 | 12.7948 |
| H | 3.6283  | 11.5203 | 12.8231 |
| C | 10.0976 | 7.2605  | 3.8939  |
| H | 9.9229  | 6.8049  | 4.7089  |
| C | 11.0253 | 13.8778 | -0.9808 |
| H | 10.3095 | 13.8778 | -1.6054 |
| C | 8.5643  | 8.8302  | 8.9446  |
| C | 11.391  | 7.2975  | 3.3922  |
| C | 1.5465  | 12.4631 | 14.1432 |
| C | 12.9516 | 7.9897  | 1.5874  |

|   |         |         |         |
|---|---------|---------|---------|
| N | 13.2951 | 6.2886  | 4.8082  |
| C | 11.8087 | 13.8778 | 1.2757  |
| H | 11.6224 | 13.8778 | 2.2073  |
| C | 8.3308  | 8.2217  | 10.1587 |
| H | 7.4682  | 8.2394  | 10.5562 |
| C | 12.4621 | 6.7301  | 4.1486  |
| C | 9.8328  | 8.8046  | 8.3611  |
| H | 9.9947  | 9.2499  | 7.5377  |
| C | 12.3392 | 13.8778 | -1.4197 |
| H | 12.5224 | 13.8778 | -2.3518 |
| C | 9.4     | 7.5777  | 10.7887 |
| H | 9.2582  | 7.1707  | 11.6353 |
| C | 10.8534 | 8.1172  | 9.0047  |
| H | 11.7106 | 8.0604  | 8.5991  |
| C | 10.6351 | 7.516   | 10.2272 |
| H | 11.342  | 7.0633  | 10.672  |
| C | 13.1276 | 13.8778 | 0.8398  |
| H | 13.8412 | 13.8778 | 1.467   |
| O | 8.2653  | 18.652  | 1.2926  |
| O | 7.7543  | 19.981  | 3.6502  |
| O | 5.679   | 15.224  | 11.5993 |
| N | 7.5009  | 18.2436 | 8.2539  |
| C | 8.0725  | 17.2649 | 1.5241  |
| N | 0.7379  | 15.8537 | 14.7376 |
| C | 6.6797  | 17.2219 | 8.7886  |
| C | 4.8822  | 15.132  | 9.2806  |
| C | 8.7198  | 14.9948 | 1.2571  |
| C | 7.3024  | 19.0857 | 4.6399  |
| C | 6.8773  | 16.903  | 2.1835  |
| N | 13.995  | 19.7312 | 1.116   |
| C | 6.251   | 17.4117 | 6.5372  |
| C | 4.6109  | 14.5757 | 12.1445 |
| C | 5.659   | 15.712  | 10.2866 |
| C | 5.9639  | 17.9396 | 2.8008  |
| H | 5.025   | 17.63   | 2.7488  |
| H | 6.037   | 18.7897 | 2.2987  |
| C | 8.9826  | 16.3636 | 1.0346  |
| H | 9.7578  | 16.6486 | 0.5653  |
| C | 5.8951  | 16.7203 | 7.7555  |
| C | 7.2458  | 18.3311 | 6.8845  |
| C | 6.6361  | 15.5563 | 2.3812  |

|   |         |         |         |
|---|---------|---------|---------|
| H | 5.8493  | 15.286  | 2.8399  |
| C | 7.5239  | 14.59   | 1.921   |
| C | 5.0145  | 15.6612 | 8.0024  |
| H | 4.5017  | 15.3003 | 7.2888  |
| C | 6.3437  | 18.1662 | 4.2386  |
| C | 9.293   | 19.2377 | 2.0022  |
| C | 2.571   | 14.5801 | 13.4047 |
| C | 7.776   | 19.2114 | 5.931   |
| H | 8.4287  | 19.8622 | 6.1616  |
| C | 6.5764  | 16.7359 | 10.086  |
| H | 7.1031  | 17.0839 | 10.7958 |
| C | 10.5825 | 19.2297 | 1.4678  |
| H | 10.7468 | 18.8145 | 0.6293  |
| C | 5.793   | 17.3101 | 5.2325  |
| H | 5.1211  | 16.678  | 5.0055  |
| C | 11.6252 | 19.8292 | 2.1623  |
| C | 9.0462  | 19.8677 | 3.2113  |
| C | 3.6078  | 15.2861 | 12.7948 |
| H | 3.6283  | 16.2354 | 12.8231 |

|   |         |         |         |
|---|---------|---------|---------|
| C | 10.0976 | 20.4952 | 3.8939  |
| H | 9.9229  | 20.9507 | 4.7089  |
| C | 8.5643  | 18.9255 | 8.9446  |
| C | 11.391  | 20.4582 | 3.3922  |
| C | 1.5465  | 15.2926 | 14.1432 |
| C | 12.9516 | 19.7659 | 1.5874  |
| N | 13.2951 | 21.4672 | 4.8082  |
| C | 8.3308  | 19.5339 | 10.1587 |
| H | 7.4682  | 19.5163 | 10.5562 |
| C | 12.4621 | 21.0255 | 4.1486  |
| C | 9.8328  | 18.9512 | 8.3611  |
| H | 9.9947  | 18.5058 | 7.5377  |
| C | 9.4     | 20.178  | 10.7887 |
| H | 9.2582  | 20.5849 | 11.6353 |
| C | 10.8534 | 19.6385 | 9.0047  |
| H | 11.7106 | 19.6953 | 8.5991  |
| C | 10.6351 | 20.2396 | 10.2272 |
| H | 11.342  | 20.6924 | 10.672  |

## 2-c2

|   |         |         |         |
|---|---------|---------|---------|
| O | 17.4524 | 12.245  | 4.0573  |
| O | 17.0422 | 9.4091  | 4.5038  |
| O | 13.1847 | 3.6138  | 10.852  |
| O | 14.5932 | 3.6816  | 13.1459 |
| O | 21.9603 | 9.6005  | 12.412  |
| O | 22.4736 | 12.4133 | 12.047  |
| N | 14.5828 | 12.3265 | -0.9371 |
| N | 13.8456 | 8.5959  | -0.315  |
| N | 15.2719 | 5.5184  | 6.8367  |
| N | 14.2685 | -1.963  | 9.5164  |
| N | 16.2968 | -1.8395 | 13.0058 |
| N | 19.1116 | 5.6487  | 12.9115 |
| N | 24.1629 | 9.4851  | 17.816  |
| N | 25.2952 | 13.1559 | 17.0494 |
| N | 20.8671 | 12.5029 | 7.4849  |
| C | 16.7197 | 11.4278 | 3.2571  |
| C | 16.2255 | 12.0468 | 2.1186  |
| H | 16.3767 | 12.9744 | 1.9787  |
| C | 15.5085 | 11.3124 | 1.184   |
| C | 15.225  | 9.9861  | 1.3836  |

|   |         |         |         |
|---|---------|---------|---------|
| C | 15.724  | 9.3358  | 2.5429  |
| H | 15.5461 | 8.4161  | 2.6974  |
| C | 16.4722 | 10.0689 | 3.4409  |
| C | 14.9797 | 11.9328 | 0.0059  |
| C | 14.4698 | 9.1919  | 0.4346  |
| C | 16.1628 | 8.8145  | 5.4007  |
| C | 16.1333 | 7.4325  | 5.451   |
| H | 16.5839 | 6.8977  | 4.8084  |
| C | 15.4062 | 6.8719  | 6.4955  |
| C | 14.6043 | 5.4695  | 8.0685  |
| C | 14.2612 | 4.3794  | 8.8235  |
| H | 14.3724 | 3.4935  | 8.4985  |
| C | 13.74   | 4.6319  | 10.0938 |
| C | 13.6544 | 5.927   | 10.6423 |
| C | 13.873  | 6.9981  | 9.7912  |
| H | 13.7227 | 7.8839  | 10.0994 |
| C | 14.3086 | 6.7863  | 8.4951  |
| C | 14.7682 | 7.6633  | 7.4745  |
| C | 14.7647 | 9.0426  | 7.3311  |
| H | 14.2936 | 9.5809  | 7.9559  |

|   |         |         |         |   |         |         |         |
|---|---------|---------|---------|---|---------|---------|---------|
| C | 15.4447 | 9.6412  | 6.2813  | H | 22.2917 | 1.6233  | 12.4413 |
| C | 15.5385 | 11.1427 | 6.1498  | C | 22.0596 | 3.4536  | 13.2884 |
| H | 15.2429 | 11.4135 | 5.2447  | H | 22.8952 | 3.4633  | 13.7371 |
| H | 14.9359 | 11.5697 | 6.8094  | C | 21.1897 | 4.5097  | 13.4413 |
| C | 15.8852 | 4.4269  | 6.1602  | H | 21.4156 | 5.2176  | 14.0344 |
| C | 13.9256 | 2.5264  | 11.1674 | C | 22.533  | 10.3635 | 13.4074 |
| C | 13.8394 | 1.3765  | 10.4582 | C | 22.8961 | 9.796   | 14.5988 |
| H | 13.3207 | 1.3527  | 9.6636  | H | 22.6727 | 8.889   | 14.7693 |
| C | 14.4909 | 0.2539  | 10.8699 | C | 23.5827 | 10.5196 | 15.5632 |
| C | 15.2124 | 0.2593  | 12.0628 | C | 23.9062 | 11.8568 | 15.2922 |
| C | 15.2917 | 1.4254  | 12.8005 | C | 23.526  | 12.4527 | 14.1053 |
| H | 15.7808 | 1.4415  | 13.6148 | H | 23.7521 | 13.3564 | 13.9214 |
| C | 14.6665 | 2.5495  | 12.3543 | C | 22.7978 | 11.6911 | 13.1759 |
| C | 14.3923 | -0.9598 | 10.1113 | C | 23.9291 | 9.9548  | 16.8135 |
| C | 15.8486 | -0.8973 | 12.5447 | C | 24.6778 | 12.6102 | 16.256  |
| C | 15.4978 | 4.7242  | 12.9195 | C | 21.4287 | 12.1038 | 11.1382 |
| C | 16.8668 | 4.4812  | 13.0266 | C | 21.7845 | 12.4066 | 9.8442  |
| H | 17.2027 | 3.599   | 13.1355 | H | 22.6643 | 12.6874 | 9.6223  |
| C | 17.7368 | 5.5931  | 12.9671 | C | 20.7847 | 12.2803 | 8.8681  |
| C | 19.4613 | 7.0022  | 12.9124 | C | 19.6056 | 12.2409 | 6.9524  |
| C | 20.7336 | 7.5914  | 12.741  | C | 19.1612 | 12.3251 | 5.6334  |
| H | 21.5235 | 7.0749  | 12.6303 | H | 19.7384 | 12.6044 | 4.9326  |
| C | 20.7473 | 8.9951  | 12.7458 | C | 17.8496 | 11.9844 | 5.3906  |
| C | 19.6385 | 9.7851  | 12.9763 | C | 16.9505 | 11.6192 | 6.3794  |
| C | 18.3973 | 9.1607  | 13.0894 | C | 17.4083 | 11.554  | 7.7092  |
| H | 17.6141 | 9.6819  | 13.2203 | H | 16.8225 | 11.291  | 8.4095  |
| C | 18.3032 | 7.7855  | 13.0117 | C | 18.7447 | 11.8825 | 7.982   |
| C | 17.1891 | 6.8854  | 12.9856 | C | 19.5109 | 11.9111 | 9.2224  |
| C | 15.8034 | 7.066   | 12.8059 | C | 19.1753 | 11.6165 | 10.5361 |
| H | 15.449  | 7.9458  | 12.76   | H | 18.2912 | 11.3499 | 10.7586 |
| C | 14.9594 | 5.9935  | 12.6961 | C | 20.1632 | 11.7196 | 11.5359 |
| C | 13.5399 | 6.1307  | 12.149  | C | 19.7329 | 11.3015 | 12.9115 |
| H | 12.9455 | 5.4473  | 12.5486 | H | 18.8521 | 11.701  | 13.1226 |
| H | 13.1737 | 7.0281  | 12.3522 | H | 20.3878 | 11.6249 | 13.5799 |
| C | 20.0048 | 4.5586  | 12.7508 | C | 21.9519 | 12.955  | 6.7685  |
| C | 19.7038 | 3.5011  | 11.914  | C | 22.3841 | 14.28   | 6.9164  |
| H | 18.8869 | 3.5054  | 11.4311 | H | 21.9532 | 14.8656 | 7.5273  |
| C | 20.5644 | 2.4463  | 11.7712 | C | 23.4569 | 14.7184 | 6.1489  |
| H | 20.3523 | 1.7478  | 11.1639 | H | 23.7302 | 15.6259 | 6.2097  |
| C | 21.7262 | 2.3866  | 12.4911 | C | 24.1365 | 13.8646 | 5.2951  |
| H | 24.8382 | 14.2001 | 4.7511  | C | 23.8001 | 12.5301 | 5.2356  |

|   |         |         |        |
|---|---------|---------|--------|
| H | 24.2975 | 11.9136 | 4.7108 |
| H | 22.4577 | 11.2187 | 5.9313 |
| C | 17.2648 | 4.5043  | 5.9496 |
| H | 17.744  | 5.2471  | 6.2986 |
| C | 17.9457 | 3.5323  | 5.2535 |
| H | 18.8793 | 3.5884  | 5.084  |
| C | 17.1831 | 2.4789  | 4.8221 |

|   |         |         |        |
|---|---------|---------|--------|
| C | 22.7078 | 12.1337 | 5.9764 |
| H | 17.6216 | 1.8011  | 4.3228 |
| C | 15.8165 | 2.3146  | 5.0571 |
| H | 15.3611 | 1.517   | 4.8107 |
| C | 15.1544 | 3.3626  | 5.661  |
| H | 14.2078 | 3.355   | 5.7341 |

## 2-c3

|   |         |         |         |
|---|---------|---------|---------|
| O | 2.5817  | 26.5896 | 12.5308 |
| O | -3.8368 | 33.449  | 20.4305 |
| O | -4.0857 | 23.9212 | 21.0282 |
| O | 2.4798  | 29.3679 | 12.2408 |
| O | -2.4144 | 34.6867 | 18.4296 |
| O | -2.7798 | 22.3457 | 19.181  |
| N | -4.0267 | 28.7853 | 21.9533 |
| N | 1.8408  | 21.0561 | 22.3919 |
| N | 0.8159  | 32.9321 | 15.163  |
| N | 0.0081  | 23.4725 | 25.1784 |
| N | 7.3321  | 30.5521 | 15.2519 |
| N | 7.7371  | 26.7351 | 15.4403 |
| N | 0.7289  | 23.5177 | 15.9007 |
| N | 0.3902  | 33.7442 | 24.4918 |
| N | 2.4728  | 35.6062 | 21.5222 |
| C | -3.9778 | 32.0655 | 20.2138 |
| C | -2.4527 | 31.8065 | 16.1376 |
| H | -3.0267 | 31.0922 | 15.8881 |
| C | -0.4453 | 31.1072 | 14.6353 |
| C | -1.2652 | 24.6157 | 16.0326 |
| C | -0.6829 | 26.3489 | 14.2046 |
| H | -1.529  | 26.781  | 14.2128 |
| C | -4.2514 | 30.2422 | 18.6657 |
| H | -4.3693 | 29.9159 | 17.7807 |
| C | -1.9798 | 33.7615 | 17.4219 |
| C | 3.4903  | 28.7926 | 12.9769 |
| C | -2.537  | 33.8544 | 20.6769 |
| C | 1.8129  | 25.0205 | 14.1857 |
| H | 2.653   | 24.5778 | 14.1708 |
| C | 3.5403  | 27.3988 | 13.0953 |
| C | 0.7928  | 31.7523 | 14.428  |

|   |         |         |         |
|---|---------|---------|---------|
| C | 0.0449  | 27.9972 | 12.4788 |
| H | 0.6223  | 27.9462 | 11.6765 |
| H | -0.8973 | 27.9572 | 12.1781 |
| C | -3.0395 | 24.1299 | 17.6076 |
| C | 1.8478  | 22.6611 | 16.213  |
| C | -1.1922 | 31.9357 | 15.5642 |
| C | -4.1587 | 29.3445 | 19.748  |
| C | -4.059  | 29.8272 | 21.0672 |
| C | 1.9235  | 33.8115 | 15.303  |
| C | -4.0774 | 27.5844 | 21.2046 |
| C | -4.2624 | 26.8838 | 18.8999 |
| H | -4.3395 | 27.0991 | 17.9772 |
| C | -0.4971 | 23.5498 | 16.5603 |
| C | -2.2436 | 23.0848 | 18.0869 |
| C | 1.3815  | 35.2441 | 21.3607 |
| C | -4.1647 | 31.6261 | 18.9053 |
| C | -4.3815 | 24.4856 | 18.2323 |
| H | -5.0014 | 24.7943 | 17.5253 |
| H | -4.7738 | 23.6775 | 18.6503 |
| C | 5.5504  | 29.0074 | 14.2073 |
| C | -4.239  | 25.5717 | 19.2822 |
| C | 1.7827  | 35.1473 | 14.9934 |
| H | 0.9649  | 35.4601 | 14.6257 |
| C | -1.8254 | 34.4893 | 19.6565 |
| C | -2.2073 | 22.5829 | 20.3861 |
| C | -2.859  | 23.4245 | 21.3176 |
| C | 2.4847  | 21.9791 | 15.225  |
| H | 2.1737  | 22.0382 | 14.3287 |
| C | -0.428  | 22.2066 | 21.9611 |
| C | -2.2788 | 23.6104 | 22.5857 |
| H | -2.7276 | 24.1341 | 23.2377 |

|   |         |         |         |
|---|---------|---------|---------|
| C | -4.025  | 28.9208 | 23.3638 |
| C | 6.7844  | 27.0556 | 14.9288 |
| C | -1.0735 | 23.0399 | 22.8819 |
| C | 6.5508  | 29.8406 | 14.7861 |
| C | 2.8105  | 36.0325 | 15.2088 |
| H | 2.6985  | 36.9521 | 15.0008 |
| C | 0.8155  | 21.5656 | 22.2384 |
| C | 3.383   | 21.8156 | 17.8284 |
| H | 3.6972  | 21.7585 | 18.7245 |
| C | -0.088  | 33.9204 | 23.4526 |
| C | 4.0122  | 35.5774 | 15.7284 |
| H | 4.7161  | 36.1907 | 15.9062 |
| C | 4.1894  | 34.2121 | 15.995  |
| H | 5.0224  | 33.8922 | 16.3188 |
| C | -0.4378 | 23.3027 | 24.1742 |
| C | 3.5954  | 21.2003 | 15.5265 |
| H | 4.036   | 20.7077 | 14.8461 |
| C | 4.0494  | 21.1522 | 16.8323 |
| H | 4.8304  | 20.6531 | 17.04   |
| C | -0.7617 | 33.9679 | 16.8242 |
| H | -0.2151 | 34.7135 | 17.0421 |
| C | -2.9626 | 29.7669 | 23.9669 |
| H | -2.2768 | 30.1357 | 23.421  |
| C | -4.9348 | 28.4497 | 24.1634 |
| H | -5.6313 | 27.9081 | 23.8099 |
| C | -3.9953 | 29.4016 | 26.1045 |
| H | -3.9885 | 29.5026 | 27.0502 |
| C | -4.9107 | 28.7285 | 25.5553 |
| H | -5.6148 | 28.3936 | 26.0971 |
| C | 0.7629  | 24.5683 | 15.0042 |
| C | 5.6439  | 27.6068 | 14.2907 |
| C | -1.9664 | 33.6929 | 21.9342 |
| H | -2.4666 | 33.2907 | 22.633  |
| C | 4.6503  | 26.8088 | 13.7388 |
| H | 4.7183  | 25.8636 | 13.7948 |
| C | -4.0532 | 26.2672 | 21.638  |
| H | -3.9997 | 26.0473 | 22.561  |

|   |         |         |         |
|---|---------|---------|---------|
| C | 0.0389  | 34.7697 | 21.1561 |
| C | -1.007  | 21.9759 | 20.7253 |
| H | -0.5806 | 21.3962 | 20.1044 |
| C | -4.1101 | 25.2833 | 20.658  |
| C | 3.1396  | 33.3372 | 15.7769 |
| H | 3.2514  | 32.4119 | 15.9548 |
| C | 0.3306  | 26.8117 | 13.37   |
| C | -0.6938 | 29.8942 | 13.9811 |
| H | -1.5345 | 29.4648 | 14.0861 |
| C | -0.3726 | 33.0115 | 15.8738 |
| C | -2.5339 | 24.8776 | 16.5496 |
| H | -3.0588 | 25.5742 | 16.1734 |
| C | -0.659  | 34.1192 | 22.1684 |
| C | 2.2437  | 22.5752 | 17.5403 |
| H | 1.7583  | 23.0152 | 18.2272 |
| C | -4.1771 | 27.9145 | 19.8396 |
| C | -0.5513 | 34.9559 | 19.9122 |
| H | -0.073  | 35.4106 | 19.2291 |
| C | -2.9801 | 30.0105 | 25.3265 |
| H | -2.3279 | 30.5723 | 25.7305 |
| C | -1.016  | 22.7412 | 17.5753 |
| H | -0.5398 | 21.9853 | 17.8991 |
| C | -0.451  | 25.2429 | 15.0365 |
| C | 4.4717  | 29.5522 | 13.5342 |
| H | 4.4124  | 30.4987 | 13.4597 |
| C | -2.8605 | 32.7507 | 17.0934 |
| C | 0.2845  | 29.3134 | 13.1761 |
| C | -3.9598 | 31.2056 | 21.3284 |
| H | -3.8848 | 31.5402 | 22.2144 |
| C | 1.5706  | 26.1451 | 13.3996 |
| C | -4.2095 | 32.5907 | 17.753  |
| H | -4.5199 | 33.4729 | 18.0771 |
| H | -4.8631 | 32.2666 | 17.0824 |
| C | 1.7788  | 31.2175 | 13.6096 |
| H | 2.6024  | 31.6655 | 13.4571 |
| C | 1.4935  | 29.9967 | 13.0334 |

# **C<sub>60</sub>@2**

|   |        |         |         |
|---|--------|---------|---------|
| O | 2.5729 | 26.5925 | 12.5421 |
|---|--------|---------|---------|

|   |         |         |         |
|---|---------|---------|---------|
| O | -3.8352 | 33.4545 | 20.4265 |
|---|---------|---------|---------|



|   |         |         |         |   |         |         |         |
|---|---------|---------|---------|---|---------|---------|---------|
| O | -4.0843 | 23.9296 | 21.0269 | C | -0.5021 | 23.5591 | 16.5576 |
| O | 2.4843  | 29.3628 | 12.2346 | C | -2.2349 | 23.0623 | 18.1219 |
| O | -2.3965 | 34.6851 | 18.435  | C | 1.3712  | 35.2377 | 21.3742 |
| O | -2.7603 | 22.3585 | 19.1816 | C | -4.1594 | 31.6386 | 18.9349 |
| N | -4.0203 | 28.7955 | 21.9557 | C | -4.3672 | 24.4853 | 18.2484 |
| N | 1.8308  | 21.0272 | 22.3865 | H | -5.0062 | 24.7655 | 17.5467 |
| N | 0.8231  | 32.9215 | 15.1711 | H | -4.735  | 23.6792 | 18.6902 |
| N | 0.0032  | 23.4629 | 25.2053 | C | 5.5223  | 29.0426 | 14.1992 |
| N | 7.3815  | 30.4912 | 15.2707 | C | -4.2348 | 25.5878 | 19.2634 |
| N | 7.7576  | 26.7287 | 15.4    | C | 1.7962  | 35.1351 | 15.0338 |
| N | 0.7508  | 23.5094 | 15.89   | H | 0.9664  | 35.4675 | 14.7119 |
| N | 0.4002  | 33.7346 | 24.4972 | C | -1.8276 | 34.4941 | 19.6511 |
| N | 2.4849  | 35.5966 | 21.533  | C | -2.2022 | 22.5976 | 20.3726 |
| C | -3.9966 | 32.0808 | 20.1896 | C | -2.8547 | 23.4277 | 21.3446 |
| C | -2.4422 | 31.8245 | 16.1376 | C | 2.495   | 21.9743 | 15.2573 |
| H | -3.0122 | 31.1055 | 15.8881 | H | 2.2008  | 22.0367 | 14.3572 |
| C | -0.43   | 31.1139 | 14.6246 | C | -0.4236 | 22.2162 | 21.9557 |
| C | -1.266  | 24.6218 | 16.0273 | C | -2.3044 | 23.5879 | 22.5642 |
| C | -0.7159 | 26.3515 | 14.2234 | H | -2.7518 | 24.1035 | 23.2253 |
| H | -1.5658 | 26.7759 | 14.2272 | C | -4.0199 | 28.9176 | 23.3799 |
| C | -4.2711 | 30.2477 | 18.6819 | C | 6.7899  | 27.0556 | 14.9261 |
| H | -4.4228 | 29.9294 | 17.7987 | C | -1.1147 | 23.0142 | 22.8442 |
| C | -1.9916 | 33.7762 | 17.438  | C | 6.5524  | 29.831  | 14.7834 |
| C | 3.5001  | 28.7798 | 12.985  | C | 2.8403  | 36.0293 | 15.2115 |
| C | -2.5283 | 33.8352 | 20.6822 | H | 2.7396  | 36.9418 | 14.9724 |
| C | 1.7914  | 25.0343 | 14.2073 | C | 0.8341  | 21.6009 | 22.2357 |
| H | 2.6363  | 24.6008 | 14.2131 | C | 3.3708  | 21.8156 | 17.8176 |
| C | 3.5481  | 27.3915 | 13.0953 | H | 3.672   | 21.7476 | 18.7148 |
| C | 0.7868  | 31.7338 | 14.4523 | C | -0.0876 | 33.9365 | 23.4472 |
| C | 0.0356  | 27.985  | 12.4815 | C | 4.0468  | 35.5646 | 15.7526 |
| H | -0.9103 | 27.9295 | 12.196  | H | 4.7543  | 36.1673 | 15.9491 |
| H | 0.5998  | 27.9325 | 11.6683 | C | 4.182   | 34.2281 | 15.9896 |
| C | -3.0414 | 24.1327 | 17.5996 | H | 5.0177  | 33.9008 | 16.3008 |
| C | 1.8278  | 22.6617 | 16.2023 | C | -0.4508 | 23.277  | 24.158  |
| C | -1.1935 | 31.927  | 15.5642 | C | 3.5835  | 21.1843 | 15.5426 |
| C | -4.154  | 29.3388 | 19.7534 | H | 4.0047  | 20.6674 | 14.8659 |
| C | -4.0617 | 29.8438 | 21.0834 | C | 4.0488  | 21.165  | 16.8538 |
| C | 1.9035  | 33.8179 | 15.2923 | H | 4.8457  | 20.6946 | 17.0681 |
| C | -4.0684 | 27.61   | 21.1911 | C | -0.747  | 33.9704 | 16.8053 |
| C | -4.2655 | 26.8761 | 18.8757 | H | -0.2008 | 34.7202 | 17.0103 |
| H | -4.3473 | 27.1001 | 17.957  | C | -2.935  | 29.7445 | 23.9803 |

|   |         |         |         |   |         |         |         |
|---|---------|---------|---------|---|---------|---------|---------|
| H | -2.2468 | 30.1041 | 23.4358 | C | 0.2704  | 29.3243 | 13.1573 |
| C | -4.8973 | 28.4786 | 24.1688 | C | -3.966  | 31.2091 | 21.3392 |
| H | -5.5937 | 27.946  | 23.8036 | H | -3.8844 | 31.55   | 22.2213 |
| C | -4.0546 | 29.3631 | 26.1099 | C | 1.5564  | 26.1557 | 13.3969 |
| H | -4.0899 | 29.4752 | 27.0523 | C | -4.2105 | 32.6161 | 17.7342 |
| C | -4.917  | 28.7189 | 25.5526 | H | -4.8718 | 32.2904 | 17.0743 |
| H | -5.6317 | 28.3677 | 26.0701 | H | -4.5086 | 33.5063 | 18.0509 |
| C | 0.7604  | 24.5875 | 14.988  | C | 1.7518  | 31.2219 | 13.6042 |
| C | 5.6504  | 27.6389 | 14.3069 | H | 2.5519  | 31.6997 | 13.4143 |
| C | -1.9822 | 33.7121 | 21.9207 | C | 1.4943  | 29.972  | 13.0388 |
| H | -2.4909 | 33.3276 | 22.624  | C | 1.5866  | 31.3918 | 22.093  |
| C | 4.6557  | 26.8216 | 13.7065 | C | 1.7019  | 31.8693 | 20.8438 |
| H | 4.7494  | 25.878  | 13.7257 | C | 1.0195  | 31.6033 | 19.6538 |
| C | -4.0564 | 26.2544 | 21.6299 | C | -0.1116 | 30.8245 | 19.8638 |
| H | -4.0084 | 26.0252 | 22.551  | C | -0.3823 | 30.3791 | 21.1561 |
| C | 0.029   | 34.7697 | 21.1346 | C | 0.4315  | 30.4688 | 22.3542 |
| C | -1.0132 | 21.9791 | 20.7361 | C | 0.7536  | 29.4176 | 23.2022 |
| H | -0.5982 | 21.3796 | 20.1275 | C | 0.1648  | 28.1805 | 22.9465 |
| C | -4.1171 | 25.2961 | 20.6472 | C | -0.721  | 27.9401 | 21.7188 |
| C | 3.1288  | 33.3147 | 15.7957 | C | -0.9938 | 29.0619 | 20.9057 |
| H | 3.2361  | 32.3921 | 15.9923 | C | -0.9922 | 28.7478 | 19.4734 |
| C | 0.351   | 26.8088 | 13.3753 | C | -0.3511 | 29.924  | 18.7869 |
| C | -0.6891 | 29.9054 | 14.0026 | C | 0.3885  | 29.5746 | 17.6534 |
| H | -1.5197 | 29.4669 | 14.1485 | C | 0.6176  | 28.1068 | 17.2253 |
| C | -0.355  | 33.0372 | 15.8819 | C | 0.0735  | 27.1005 | 18.0465 |
| C | -2.5435 | 24.8731 | 16.5549 | C | -0.7103 | 27.3857 | 19.1611 |
| H | -3.073  | 25.57   | 16.1848 | C | -0.2922 | 26.2992 | 19.9876 |
| C | -0.6697 | 34.1512 | 22.1711 | C | -0.3086 | 26.6422 | 21.3338 |
| C | 2.2463  | 22.5784 | 17.5403 | C | 0.7247  | 26.0236 | 22.093  |
| H | 1.7746  | 23.0263 | 18.2335 | C | 1.8888  | 25.2705 | 21.6057 |
| C | -4.176  | 27.8793 | 19.8422 | C | 1.9487  | 24.9884 | 20.2703 |
| C | -0.5531 | 34.946  | 19.9338 | C | 0.77    | 25.466  | 19.5596 |
| H | -0.0686 | 35.3993 | 19.2552 | C | 0.9206  | 26.014  | 18.2188 |
| C | -2.9433 | 29.9784 | 25.3399 | C | 2.1674  | 26.107  | 17.6669 |
| H | -2.2742 | 30.5042 | 25.762  | C | 3.3126  | 25.6198 | 18.3426 |
| C | -1.0368 | 22.729  | 17.5592 | C | 3.1662  | 25.1038 | 19.7103 |
| H | -0.5713 | 21.9513 | 17.8403 | C | 3.913   | 25.2897 | 20.8815 |
| C | -0.4374 | 25.2288 | 15.0607 | C | 3.1974  | 25.5237 | 22.0688 |
| C | 4.4885  | 29.5554 | 13.5369 | C | 3.3741  | 26.5396 | 23.0111 |
| H | 4.4333  | 30.4995 | 13.4397 | C | 4.5128  | 27.3248 | 22.8495 |
| C | -2.8783 | 32.7503 | 17.0719 | C | 5.3264  | 27.0428 | 21.7538 |

|   |        |         |         |
|---|--------|---------|---------|
| C | 5.0221 | 26.123  | 20.6984 |
| C | 5.2979 | 26.6326 | 19.3926 |
| C | 5.8259 | 27.9113 | 19.6565 |
| C | 5.565  | 29.0106 | 18.8273 |
| C | 4.7911 | 28.7894 | 17.6211 |
| C | 4.1382 | 27.5427 | 17.3357 |
| C | 4.5031 | 26.421  | 18.2026 |
| C | 2.7596 | 27.2415 | 17.0476 |
| C | 1.9542 | 28.3728 | 16.8619 |
| C | 2.5678 | 29.6387 | 16.9507 |
| C | 1.5158 | 30.4175 | 17.473  |
| C | 1.7473 | 31.4046 | 18.4611 |
| C | 3.0562 | 31.6258 | 18.9215 |
| C | 3.1074 | 31.927  | 20.3026 |
| C | 4.2269 | 31.4623 | 21.0026 |

|   |        |         |         |
|---|--------|---------|---------|
| C | 3.9557 | 30.9175 | 22.2707 |
| C | 2.6768 | 30.7636 | 22.9061 |
| C | 2.1193 | 29.6131 | 23.5334 |
| C | 2.9294 | 28.5074 | 23.7865 |
| C | 2.2733 | 27.2928 | 23.5684 |
| C | 0.9468 | 27.03   | 23.1295 |
| C | 4.2291 | 28.6709 | 23.2884 |
| C | 4.7927 | 29.7733 | 22.5292 |
| C | 5.8606 | 28.2126 | 21.0322 |
| C | 5.5796 | 29.533  | 21.3796 |
| C | 5.2604 | 30.6098 | 20.5584 |
| C | 5.2108 | 30.3438 | 19.2042 |
| C | 4.1731 | 30.9399 | 18.4503 |
| C | 3.8989 | 29.9656 | 17.4111 |

# C<sub>70</sub>@2

|   |         |         |         |
|---|---------|---------|---------|
| O | 7.5901  | 35.3571 | 4.9156  |
| O | 9.0614  | 33.8904 | 6.7945  |
| O | 9.6687  | 24.362  | 6.675   |
| O | 8.1946  | 22.9138 | 4.8446  |
| O | 2.5248  | 27.4633 | -1.3136 |
| O | 2.4224  | 30.2713 | -1.2515 |
| N | 9.4129  | 29.093  | 7.98    |
| N | 4.6303  | 24.1716 | 1.7004  |
| N | 4.1822  | 33.733  | 1.7625  |
| N | 3.2324  | 36.7842 | 8.5642  |
| N | 5.1332  | 34.2113 | 11.0705 |
| N | 6.123   | 23.5931 | 11.2257 |
| N | 3.9374  | 21.352  | 8.5947  |
| N | -2.5221 | 26.7464 | 1.6247  |
| N | -2.4871 | 30.637  | 1.8991  |
| C | 9.3486  | 33.2523 | 4.0758  |
| H | 9.9753  | 32.9949 | 3.354   |
| H | 9.6608  | 34.1098 | 4.46    |
| C | 7.0946  | 35.136  | 6.1882  |
| C | 5.9143  | 35.7609 | 6.5818  |
| H | 5.4594  | 36.3259 | 5.9673  |
| C | 5.4005  | 35.5784 | 7.8295  |
| C | 6.0642  | 34.7647 | 8.7527  |

|   |        |         |         |
|---|--------|---------|---------|
| C | 7.2785 | 34.1612 | 8.3729  |
| H | 7.7447 | 33.6058 | 8.9863  |
| C | 7.7935 | 34.3783 | 7.0975  |
| C | 4.183  | 36.2439 | 8.2481  |
| C | 5.5617 | 34.4814 | 10.0613 |
| C | 9.1806 | 32.5124 | 6.4987  |
| C | 9.36   | 32.1873 | 5.1513  |
| C | 9.5121 | 30.8419 | 4.828   |
| H | 9.6331 | 30.5797 | 3.9229  |
| C | 9.4867 | 29.8862 | 5.833   |
| C | 9.5536 | 28.4229 | 5.802   |
| C | 9.6617 | 27.5067 | 4.7714  |
| H | 9.7209 | 27.8085 | 3.8725  |
| C | 9.6834 | 26.1386 | 5.0514  |
| C | 9.6282 | 25.7489 | 6.3878  |
| C | 9.583  | 26.6344 | 7.4524  |
| H | 9.6015 | 26.332  | 8.3524  |
| C | 9.5091 | 27.9917 | 7.1391  |
| C | 9.377  | 30.2621 | 7.1835  |
| C | 9.2199 | 31.5834 | 7.5467  |
| H | 9.1425 | 31.8492 | 8.4553  |
| C | 9.4615 | 29.0491 | 9.407   |
| C | 8.6418 | 28.1159 | 10.0724 |

|   |         |         |         |   |         |         |         |
|---|---------|---------|---------|---|---------|---------|---------|
| H | 8.0393  | 27.5633 | 9.5888  | C | 1.4557  | 22.3222 | 2.0516  |
| C | 8.7333  | 28.0246 | 11.4475 | H | 0.5276  | 22.4951 | 2.159   |
| H | 8.1832  | 27.4084 | 11.9132 | C | 1.8964  | 21.0143 | 1.9906  |
| C | 9.6218  | 28.8218 | 12.1545 | H | 1.2755  | 20.2989 | 2.0328  |
| H | 9.6952  | 28.7425 | 13.0991 | C | 3.2235  | 20.7607 | 1.8714  |
| C | 10.3747 | 29.6981 | 11.4836 | H | 3.5308  | 19.8621 | 1.8799  |
| H | 10.9659 | 30.26   | 11.9734 | C | 4.1519  | 21.8102 | 1.7328  |
| C | 10.3316 | 29.8282 | 10.0946 | H | 5.0742  | 21.6262 | 1.5926  |
| H | 10.8951 | 30.4453 | 9.6432  | C | 4.9219  | 29.0057 | -1.2892 |
| C | 9.7673  | 25.1388 | 3.9397  | H | 5.8333  | 29.0515 | -1.6761 |
| H | 10.1848 | 24.3078 | 4.2785  | H | 4.2774  | 28.9937 | -2.041  |
| H | 10.3408 | 25.4983 | 3.2188  | C | 1.5378  | 28.1274 | -0.603  |
| C | 8.468   | 23.7931 | 7.0559  | C | 1.5137  | 29.5153 | -0.5462 |
| C | 7.7221  | 23.0614 | 6.1133  | C | 0.4712  | 30.1603 | 0.1303  |
| C | 6.5835  | 22.4062 | 6.5403  | H | 0.4619  | 31.1083 | 0.1899  |
| H | 6.0986  | 21.872  | 5.9212  | C | -0.538  | 29.424  | 0.7098  |
| C | 6.1371  | 22.507  | 7.8295  | C | -0.5382 | 28.0233 | 0.6099  |
| C | 6.8741  | 23.2752 | 8.7555  | C | 0.5028  | 27.3858 | -0.0444 |
| C | 8.0577  | 23.8843 | 8.3479  | H | 0.51    | 26.4385 | -0.1144 |
| H | 8.582   | 24.3664 | 8.9779  | C | -1.6234 | 30.0967 | 1.3557  |
| C | 4.9217  | 21.8827 | 8.262   | C | -1.6311 | 27.3097 | 1.1672  |
| C | 6.4311  | 23.4528 | 10.1306 | C | 3.4337  | 30.8913 | -0.4963 |
| C | 7.6169  | 23.7391 | 3.8371  | C | 4.6817  | 30.2407 | -0.458  |
| C | 8.4001  | 24.8163 | 3.3769  | C | 5.6692  | 30.7935 | 0.3202  |
| C | 7.8348  | 25.6185 | 2.3816  | H | 6.5277  | 30.3867 | 0.3512  |
| H | 8.3238  | 26.3613 | 2.0471  | C | 5.4226  | 31.9547 | 1.0707  |
| C | 6.5822  | 25.35   | 1.877   | C | 6.2181  | 32.7206 | 1.9898  |
| C | 5.7142  | 26.049  | 0.9826  | C | 7.4945  | 32.5678 | 2.5279  |
| C | 5.8408  | 27.234  | 0.2423  | H | 8.0506  | 31.858  | 2.2293  |
| H | 6.6616  | 27.7121 | 0.2548  | C | 7.9554  | 33.4395 | 3.4908  |
| C | 4.7857  | 27.7093 | -0.5013 | C | 7.1034  | 34.4607 | 3.9255  |
| C | 3.6087  | 26.9727 | -0.5232 | C | 5.8557  | 34.6821 | 3.4068  |
| C | 3.4501  | 25.7634 | 0.1164  | H | 5.3177  | 35.4073 | 3.7017  |
| H | 2.6487  | 25.2576 | 0.0369  | C | 5.4115  | 33.8005 | 2.4315  |
| C | 4.5128  | 25.3239 | 0.883   | C | 4.1671  | 32.5958 | 0.9482  |
| C | 5.8812  | 24.226  | 2.3316  | C | 3.1686  | 32.0703 | 0.1719  |
| C | 6.3902  | 23.408  | 3.3381  | H | 2.3269  | 32.5013 | 0.0933  |
| H | 5.9081  | 22.6566 | 3.6624  | C | 3.102   | 34.6425 | 2.0073  |
| C | 3.6997  | 23.1075 | 1.8021  | C | 3.3373  | 36.013  | 1.8853  |
| C | 2.336   | 23.3764 | 1.9574  | H | 4.1711  | 36.3334 | 1.5631  |
| H | 2.0235  | 24.2734 | 1.9962  | C | 2.3424  | 36.8925 | 2.2429  |

|   |         |         |        |   |         |         |         |
|---|---------|---------|--------|---|---------|---------|---------|
| H | 2.4975  | 37.8267 | 2.1658 | C | 5.215   | 28.9174 | 4.0201  |
| C | 1.138   | 36.4514 | 2.7059 | C | 3.053   | 32.6531 | 7.8406  |
| H | 0.4752  | 37.0759 | 2.9718 | C | 4.2538  | 24.9807 | 6.6345  |
| C | 0.8831  | 35.0876 | 2.7863 | C | 3.8338  | 32.6366 | 6.5153  |
| H | 0.0373  | 34.7814 | 3.0876 | C | 0.0432  | 26.2095 | 7.2445  |
| C | 1.8673  | 34.1738 | 2.4287 | C | -0.3327 | 27.4152 | 8.0984  |
| H | 1.6946  | 33.2405 | 2.47   | C | 1.6442  | 32.462  | 5.9165  |
| C | 6.2074  | 27.7347 | 7.2944 | C | 3.14    | 27.6326 | 3.1828  |
| C | 1.0047  | 28.7494 | 3.5709 | C | 3.0904  | 29.8595 | 3.1994  |
| C | 4.5628  | 27.6556 | 3.5959 | C | 6.182   | 27.6853 | 5.8638  |
| C | 3.8336  | 25.6428 | 8.883  | C | 4.5536  | 30.0045 | 3.7179  |
| C | -0.4081 | 29.5861 | 5.4202 | C | 0.0032  | 26.1534 | 5.9359  |
| C | 5.6208  | 26.5158 | 5.4756 | C | 4.8803  | 26.5257 | 4.3639  |
| C | 5.4222  | 31.2893 | 7.9099 | C | 3.3997  | 24.8687 | 5.6337  |
| C | 3.7331  | 25.6231 | 4.4415 | C | 0.6536  | 31.8131 | 8.0928  |
| C | 6.041   | 28.9009 | 5.1124 | C | 5.0473  | 32.0404 | 6.726   |
| C | 1.1235  | 30.9401 | 4.1365 | C | 3.3425  | 25.0004 | 7.9792  |
| C | 0.5561  | 27.4679 | 4.045  | C | 2.0991  | 24.9477 | 5.6531  |
| C | 2.351   | 28.7362 | 3.0996 | C | 6.1689  | 30.0572 | 5.9885  |
| C | 2.9343  | 32.5411 | 5.4146 | C | 6.0704  | 29.0623 | 8.018   |
| C | 5.3627  | 31.3848 | 5.5449 | C | 2.4921  | 28.6209 | 10.2886 |
| C | 2.5151  | 30.9895 | 3.6902 | C | 3.2444  | 27.458  | 10.089  |
| C | -0.3995 | 29.7212 | 8.0679 | C | 2.7196  | 26.2655 | 9.5401  |
| C | -0.6911 | 28.5813 | 7.3831 | C | 1.3457  | 26.2391 | 9.2185  |
| C | 1.0551  | 25.5012 | 5.2622 | C | 0.5574  | 27.4481 | 9.2711  |
| C | 0.4031  | 29.7838 | 4.2613 | C | 1.1025  | 28.5748 | 9.8977  |
| C | 2.1448  | 24.76   | 7.3554 | C | 0.3827  | 29.7969 | 9.382   |
| C | 0.7637  | 31.6418 | 5.2095 | C | 1.0848  | 31.0587 | 9.2129  |
| C | -0.1504 | 30.9203 | 5.9719 | C | 2.3781  | 31.1377 | 9.7868  |
| C | -0.2238 | 30.9401 | 7.3221 | C | 2.9974  | 29.9287 | 10.2637 |
| C | -0.6636 | 28.3903 | 5.9969 | C | 3.3161  | 32.0107 | 8.9994  |
| C | 3.4087  | 31.8756 | 4.2973 | C | 4.5832  | 31.2333 | 9.0466  |
| C | 1.3521  | 26.3445 | 4.0617 | C | 4.4287  | 29.9452 | 9.7924  |
| C | -0.2135 | 27.3196 | 5.1873 | C | 5.2268  | 28.9075 | 9.2906  |
| C | 4.6762  | 31.2168 | 4.3999 | C | 4.6208  | 27.682  | 9.6343  |
| C | 1.0343  | 25.3859 | 7.86   | C | 4.9201  | 26.5949 | 8.8858  |
| C | 1.6531  | 32.6235 | 7.336  | C | 5.6465  | 26.5949 | 7.7574  |
| C | 6.0792  | 30.1758 | 7.3082 | C | 5.2624  | 25.7417 | 6.6955  |
| C | 2.6459  | 26.4302 | 3.6513 |   |         |         |         |

### 13. References

- S1. Gaussian 09, Revision A.02, M. J. Frisch, G. W. Trucks, H. B. Schlegel, G. E. Scuseria, M. A. Robb, J. R. Cheeseman, G. Scalmani, V. Barone, B. Mennucci, G. A. Petersson, H. Nakatsuji, M. Caricato, X. Li, H. P. Hratchian, A. F. Izmaylov, J. Bloino, G. Zheng, J. L. Sonnenberg, M. Hada, M. Ehara, K. Toyota, R. Fukuda, J. Hasegawa, M. Ishida, T. Nakajima, Y. Honda, O. Kitao, H. Nakai, T. Vreven, J. A. Montgomery, Jr., J. E. Peralta, F. Ogliaro, M. Bearpark, J. J. Heyd, E. Brothers, K. N. Kudin, V. N. Staroverov, R. Kobayashi, J. Normand, K. Raghavachari, A. Rendell, J. C. Burant, S. S. Iyengar, J. Tomasi, M. Cossi, N. Rega, J. M. Millam, M. Klene, J. E. Knox, J. B. Cross, V. Bakken, C. Adamo, J. Jaramillo, R. Gomperts, R. E. Stratmann, O. Yazyev, A. J. Austin, R. Cammi, C. Pomelli, J. W. Ochterski, R. L. Martin, K. Morokuma, V. G. Zakrzewski, G. A. Voth, P. Salvador, J. J. Dannenberg, S. Dapprich, A. D. Daniels, O. Farkas, J. B. Foresman, J. V. Ortiz, J. Cioslowski, and D. J. Fox, Gaussian, Inc., Wallingford CT, 2009.
- S2. P. Yang, Y. Jian, X. Zhou, G. Li, T. Deng, H. Shen, Z. Yang, Z. Tian, *J. Org. Chem.*, 2016, **81**, 2974-2980.
- S3. F. Zhang, X. -S. Du, D. -W. Zhang, Y. -F. Wang, H. -Y. Lu, C. -F. Chen, *Angew. Chem. Int. Ed.*, 2021, **60**, 15291-15295.
- S4. P. Thordarson, *Chem. Soc. Rev.*, 2011, **40**, 1305-1323.
- S5. D. B. Hibbert and P. Thordarson, *Chem. Commun.*, 2016, **52**, 12792-12805.
- S6. <http://app.supramolecular.org/bindfit/>
